# Supplementary material
Source: publisher figshare collection journal article supplement (https://gsajournals.figshare.com/articles/dataset/_/12411035)
Supplement: Supplementary file 1 [file 1]

Suppl. Table 6. *Haloferax volcanii* pHv1 base substitution and inserion-deletion (indel) summary statistics

| MA<br>Line | Substitutions |         |       |   |       |         |               |       |       |   |       | Indels |      |   |       |   | Total<br>sites | Gen. | Base-<br>sub<br>Rate | Indel<br>Rate |
|------------|---------------|---------|-------|---|-------|---------|---------------|-------|-------|---|-------|--------|------|---|-------|---|----------------|------|----------------------|---------------|
|            | Transitions   |         |       |   |       |         | Transversions |       |       |   |       | Ins.   | Del. |   |       |   |                |      |                      |               |
|            | GC>AT         |         | AT>GC |   | AT>TA |         | GC>TA         |       | AT>CG |   | GC>CG |        |      |   |       |   |                |      |                      |               |
| Hv1        | 1             | 1.4E-08 | 0     | 0 | 0     | 0       | 0             | 0     | 0     | 0 | 0     | 0      | 0    | 0 | 0     | 0 | 39203          | 3384 | 8E-09                | 0             |
| Hv2        | 0             | 0       | 0     | 0 | 0     | 0       | 0             | 0     | 0     | 0 | 0     | 0      | 0    | 0 | 0     | 0 | 39203          | 3456 | 0                    | 0             |
| Hv4        | 0             | 0       | 0     | 0 | 0     | 0       | 0             | 0     | 0     | 0 | 0     | 0      | 0    | 0 | 0     | 0 | 39203          | 3456 | 0                    | 0             |
| Hv5        | 0             | 0       | 0     | 0 | 0     | 0       | 0             | 0     | 0     | 0 | 0     | 0      | 0    | 0 | 0     | 0 | 39203          | 3456 | 0                    | 0             |
| Hv7        | 0             | 0       | 0     | 0 | 0     | 0       | 0             | 0     | 0     | 0 | 0     | 0      | 0    | 0 | 0     | 0 | 39203          | 3072 | 0                    | 0             |
| Hv8        | 0             | 0       | 0     | 0 | 0     | 0       | 0             | 0     | 0     | 0 | 0     | 0      | 0    | 0 | 0     | 0 | 39203          | 3384 | 0                    | 0             |
| Hv16       | 0             | 0       | 0     | 0 | 0     | 0       | 0             | 0     | 0     | 0 | 0     | 0      | 0    | 0 | 0     | 0 | 39203          | 3504 | 0                    | 0             |
| Hv17       | 0             | 0       | 0     | 0 | 0     | 0       | 0             | 0     | 0     | 0 | 0     | 0      | 0    | 0 | 0     | 0 | 39203          | 3528 | 0                    | 0             |
| Hv18       | 0             | 0       | 0     | 0 | 0     | 0       | 0             | 0     | 0     | 0 | 0     | 0      | 0    | 0 | 0     | 0 | 39203          | 3312 | 0                    | 0             |
| Hv19       | 0             | 0       | 0     | 0 | 0     | 0       | 0             | 0     | 0     | 0 | 0     | 0      | 0    | 0 | 0     | 0 | 39203          | 3288 | 0                    | 0             |
| Hv20       | 0             | 0       | 0     | 0 | 0     | 0       | 0             | 0     | 0     | 0 | 0     | 0      | 0    | 0 | 0     | 0 | 39203          | 3168 | 0                    | 0             |
| Hv21       | 0             | 0       | 0     | 0 | 0     | 0       | 0             | 0     | 0     | 0 | 0     | 0      | 0    | 0 | 0     | 0 | 39203          | 3096 | 0                    | 0             |
| Hv22       | 0             | 0       | 0     | 0 | 0     | 0       | 0             | 0     | 0     | 0 | 0     | 0      | 0    | 0 | 0     | 0 | 39203          | 2832 | 0                    | 0             |
| Hv23       | 0             | 0       | 0     | 0 | 0     | 0       | 0             | 0     | 0     | 0 | 0     | 0      | 0    | 0 | 0     | 0 | 39203          | 3240 | 0                    | 0             |
| Hv25       | 0             | 0       | 0     | 0 | 0     | 0       | 0             | 0     | 0     | 0 | 0     | 0      | 0    | 0 | 0     | 0 | 71140          | 3360 | 0                    | 0             |
| Hv26       | 0             | 0       | 0     | 0 | 0     | 0       | 1             | 1E-08 | 0     | 0 | 0     | 0      | 0    | 0 | 0     | 0 | 39203          | 3360 | 8E-09                | 0             |
| Hv29       | 0             | 0       | 0     | 0 | 0     | 0       | 0             | 0     | 0     | 0 | 0     | 0      | 0    | 0 | 0     | 0 | 39203          | 3168 | 0                    | 0             |
| Hv30       | 0             | 0       | 0     | 0 | 0     | 0       | 0             | 0     | 0     | 0 | 0     | 0      | 0    | 0 | 0     | 0 | 39203          | 3360 | 0                    | 0             |
| Hv32       | 0             | 0       | 0     | 0 | 0     | 0       | 0             | 0     | 0     | 0 | 0     | 0      | 0    | 0 | 0     | 0 | 39203          | 3312 | 0                    | 0             |
| Hv33       | 0             | 0       | 0     | 0 | 0     | 0       | 0             | 0     | 0     | 0 | 0     | 0      | 0    | 0 | 0     | 0 | 39203          | 3240 | 0                    | 0             |
| Hv34       | 0             | 0       | 0     | 0 | 0     | 0       | 0             | 0     | 0     | 0 | 0     | 0      | 0    | 0 | 0     | 0 | 39203          | 3336 | 0                    | 0             |
| Hv35       | 0             | 0       | 0     | 0 | 0     | 0       | 0             | 0     | 0     | 0 | 0     | 0      | 0    | 0 | 0     | 0 | 39203          | 3288 | 0                    | 0             |
| Hv41       | 0             | 0       | 0     | 0 | 0     | 0       | 0             | 0     | 0     | 0 | 0     | 0      | 0    | 0 | 0     | 0 | 39203          | 3216 | 0                    | 0             |
| Hv42       | 0             | 0       | 0     | 0 | 0     | 0       | 0             | 0     | 0     | 0 | 0     | 0      | 0    | 1 | 8E-09 | 0 | 39203          | 3192 | 0                    | 8E-09         |
| Hv43       | 0             | 0       | 0     | 0 | 0     | 0       | 0             | 0     | 0     | 0 | 0     | 0      | 0    | 0 | 0     | 0 | 39203          | 3360 | 0                    | 0             |
| Hv44       | 0             | 0       | 0     | 0 | 0     | 0       | 0             | 0     | 0     | 0 | 0     | 0      | 0    | 0 | 0     | 0 | 39203          | 2904 | 0                    | 0             |
| Hv45       | 0             | 0       | 0     | 0 | 0     | 0       | 0             | 0     | 0     | 0 | 0     | 0      | 0    | 0 | 0     | 0 | 39203          | 3120 | 0                    | 0             |
| Hv46       | 0             | 0       | 0     | 0 | 0     | 0       | 0             | 0     | 0     | 0 | 0     | 0      | 0    | 0 | 0     | 0 | 39203          | 3288 | 0                    | 0             |
| Hv47       | 0             | 0       | 0     | 0 | 0     | 0       | 0             | 0     | 0     | 0 | 0     | 0      | 0    | 0 | 0     | 0 | 39203          | 3408 | 0                    | 0             |
| Hv48       | 0             | 0       | 0     | 0 | 0     | 0       | 0             | 0     | 0     | 0 | 0     | 0      | 0    | 0 | 0     | 0 | 39203          | 3312 | 0                    | 0             |
| Hv49       | 0             | 0       | 0     | 0 | 0     | 0       | 0             | 0     | 0     | 0 | 0     | 0      | 0    | 0 | 0     | 0 | 39203          | 3336 | 0                    | 0             |
| Hv50       | 0             | 0       | 0     | 0 | 0     | 0       | 0             | 0     | 0     | 0 | 0     | 0      | 0    | 0 | 0     | 0 | 39203          | 3408 | 0                    | 0             |
| Hv51       | 0             | 0       | 0     | 0 | 0     | 0       | 0             | 0     | 0     | 0 | 0     | 0      | 0    | 0 | 0     | 0 | 71137          | 3288 | 0                    | 0             |
| Hv52       | 0             | 0       | 0     | 0 | 0     | 0       | 0             | 0     | 0     | 0 | 0     | 0      | 0    | 0 | 0     | 0 | 71140          | 3600 | 0                    | 0             |
| Hv53       | 0             | 0       | 0     | 0 | 0     | 0       | 0             | 0     | 0     | 0 | 0     | 0      | 0    | 0 | 0     | 0 | 39203          | 3456 | 0                    | 0             |
| Hv54       | 1             | 1.3E-08 | 0     | 0 | 0     | 0       | 0             | 0     | 0     | 0 | 0     | 0      | 0    | 0 | 0     | 0 | 39203          | 3528 | 7E-09                | 0             |
| Hv65       | 0             | 0       | 0     | 0 | 0     | 0       | 0             | 0     | 0     | 0 | 0     | 0      | 0    | 0 | 0     | 0 | 39203          | 3384 | 0                    | 0             |
| Hv66       | 0             | 0       | 0     | 0 | 0     | 0       | 0             | 0     | 0     | 0 | 0     | 0      | 0    | 0 | 0     | 0 | 39203          | 3336 | 0                    | 0             |
| Hv67       | 0             | 0       | 0     | 0 | 1     | 1.8E-08 | 0             | 0     | 0     | 0 | 0     | 0      | 0    | 0 | 0     | 0 | 39203          | 3168 | 8E-09                | 0             |
| Hv68       | 0             | 0       | 0     | 0 | 0     | 0       | 0             | 0     | 0     | 0 | 0     | 0      | 0    | 0 | 0     | 0 | 39203          | 3216 | 0                    | 0             |

|                 |         |   |       |   |   |         |   |       |   |       |   |         |   |       |   |       |       |      |       |       |
|-----------------|---------|---|-------|---|---|---------|---|-------|---|-------|---|---------|---|-------|---|-------|-------|------|-------|-------|
| Hv69            | 0       | 0 | 0     | 0 | 0 | 0       | 1 | 1E-08 | 0 | 0     | 0 | 0       | 0 | 0     | 0 | 0     | 39203 | 3336 | 8E-09 | 0     |
| Hv73            | 0       | 0 | 0     | 0 | 0 | 0       | 0 | 0     | 0 | 0     | 0 | 0       | 0 | 0     | 0 | 0     | 39203 | 3096 | 0     | 0     |
| Hv74            | 0       | 0 | 0     | 0 | 0 | 0       | 0 | 0     | 0 | 0     | 0 | 0       | 0 | 0     | 0 | 0     | 39203 | 3192 | 0     | 0     |
| Hv75            | 0       | 0 | 0     | 0 | 0 | 0       | 0 | 0     | 0 | 0     | 0 | 0       | 0 | 0     | 0 | 0     | 39203 | 3192 | 0     | 0     |
| Hv76            | 0       | 0 | 0     | 0 | 0 | 0       | 0 | 0     | 0 | 0     | 0 | 0       | 0 | 0     | 0 | 0     | 39203 | 3168 | 0     | 0     |
| Hv77            | 0       | 0 | 0     | 0 | 0 | 0       | 0 | 0     | 0 | 0     | 0 | 0       | 0 | 0     | 0 | 0     | 39203 | 3144 | 0     | 0     |
| Hv79            | 0       | 0 | 0     | 0 | 0 | 0       | 0 | 0     | 0 | 0     | 0 | 0       | 0 | 0     | 0 | 0     | 39203 | 3168 | 0     | 0     |
| Hv80            | 0       | 0 | 0     | 0 | 0 | 0       | 0 | 0     | 0 | 0     | 0 | 0       | 0 | 0     | 0 | 0     | 39203 | 3000 | 0     | 0     |
| Hv85            | 0       | 0 | 0     | 0 | 0 | 0       | 0 | 0     | 0 | 0     | 0 | 0       | 0 | 0     | 0 | 0     | 71140 | 3096 | 0     | 0     |
| Hv86            | 0       | 0 | 0     | 0 | 0 | 0       | 0 | 0     | 0 | 0     | 0 | 0       | 0 | 0     | 0 | 0     | 39203 | 3096 | 0     | 0     |
| Hv87            | 0       | 0 | 0     | 0 | 0 | 0       | 0 | 0     | 0 | 0     | 0 | 0       | 0 | 0     | 0 | 0     | 39203 | 3312 | 0     | 0     |
| Hv88            | 0       | 0 | 0     | 0 | 0 | 0       | 0 | 0     | 0 | 0     | 0 | 0       | 0 | 0     | 0 | 0     | 39203 | 3432 | 0     | 0     |
| Hv90            | 0       | 0 | 0     | 0 | 0 | 0       | 0 | 0     | 0 | 0     | 0 | 0       | 0 | 0     | 0 | 0     | 39203 | 3144 | 0     | 0     |
| Hv98            | 0       | 0 | 0     | 0 | 0 | 0       | 0 | 0     | 0 | 0     | 0 | 0       | 0 | 0     | 0 | 0     | 39203 | 3312 | 0     | 0     |
|                 | 2       |   | 0     |   | 1 |         | 2 |       | 0 |       | 0 |         | 0 |       | 1 |       |       |      |       |       |
| Overall mut rat | 4.9E-10 |   |       | 0 |   | 3E-10   |   | 5E-10 |   | 0     |   | 0       |   | 0     |   | 1E-10 |       |      | 7E-10 | 1E-10 |
| lower limit     | 6E-11   |   |       | 0 |   | 7.6E-12 |   | 6E-11 |   | 0     |   | 0       |   | 0     |   | 3E-12 |       |      | 2E-10 | 3E-12 |
| upper limit     | 1.8E-09 |   | 1E-09 |   |   | 1.7E-09 |   | 2E-09 |   | 1E-09 |   | 9.1E-10 |   | 5E-10 |   | 8E-10 |       |      | 2E-09 | 8E-10 |
| SEM*            | 3.5E-10 |   |       | 0 |   | 3.3E-10 |   | 4E-10 |   | 0     |   | 0       |   | 0     |   | 1E-10 |       |      | 3E-10 | 1E-10 |

\* SEM is the standart error.
