# Supplementary material
Source: publisher figshare collection journal article supplement (https://gsajournals.figshare.com/articles/dataset/_/12411035)
Supplement: Supplementary file 3 [file 1]

Suppl. Table 2. *Haloferax volcanii* genome-wide base substitution and inserion-deletion (indel) summary statistics

| MA<br>Line | Substitutions |       |       |               |       |       |       |         |      |      |   | Indels |   |       |   |       |       | Ts/Tv<br>* | Total<br>sites | Gen.  | Base-<br>sub<br>Rate | Indel<br>Rate |
|------------|---------------|-------|-------|---------------|-------|-------|-------|---------|------|------|---|--------|---|-------|---|-------|-------|------------|----------------|-------|----------------------|---------------|
|            | Transitions   |       |       | Transversions |       |       |       |         | Ins. | Del. |   |        |   |       |   |       |       |            |                |       |                      |               |
|            | GC>AT         | AT>GC | AT>TA | GC>TA         | AT>CG |       | GC>CG |         |      |      |   |        |   |       |   |       |       |            |                |       |                      |               |
| Hv1        | 3             | 5E-10 | 0     | 0             | 0     | 0     | 1     | 1.5E-10 | 0    | 0    | 0 | 0      | 0 | 0     | 1 | 1E-10 | 3     | 3E+06      | 3384           | 4E-10 | 1E-10                |               |
| Hv2        | 2             | 3E-10 | 2     | 5E-10         | 0     | 0     | 0     | 0       | 0    | 0    | 0 | 0      | 0 | 0     | 0 | 0     | 3E+06 | 3456       | 4E-10          | 0     |                      |               |
| Hv4        | 0             | 0     | 0     | 0             | 0     | 0     | 0     | 0       | 0    | 0    | 0 | 0      | 0 | 0     | 0 | 0     | 3E+06 | 3456       | 0              | 0     |                      |               |
| Hv5        | 1             | 1E-10 | 0     | 0             | 0     | 0     | 0     | 0       | 0    | 0    | 0 | 0      | 0 | 0     | 0 | 0     | 3E+06 | 3456       | 1E-10          | 0     |                      |               |
| Hv7        | 0             | 0     | 0     | 0             | 0     | 0     | 0     | 0       | 0    | 0    | 0 | 0      | 0 | 0     | 1 | 1E-10 | 3E+06 | 3072       | 0              | 1E-10 |                      |               |
| Hv8        | 2             | 3E-10 | 0     | 0             | 0     | 0     | 0     | 0       | 0    | 0    | 0 | 0      | 0 | 0     | 0 | 0     | 3E+06 | 3384       | 2E-10          | 0     |                      |               |
| Hv16       | 2             | 3E-10 | 0     | 0             | 0     | 0     | 0     | 0       | 0    | 0    | 0 | 0      | 0 | 0     | 0 | 0     | 3E+06 | 3504       | 2E-10          | 0     |                      |               |
| Hv17       | 0             | 0     | 0     | 0             | 0     | 0     | 1     | 1.5E-10 | 0    | 0    | 0 | 0      | 0 | 0     | 1 | 9E-11 | 0     | 3E+06      | 3528           | 9E-11 | 9E-11                |               |
| Hv18       | 2             | 3E-10 | 0     | 0             | 1     | 3E-10 | 1     | 1.5E-10 | 0    | 0    | 0 | 0      | 0 | 0     | 2 | 2E-10 | 1     | 3E+06      | 3312           | 4E-10 | 2E-10                |               |
| Hv19       | 1             | 2E-10 | 0     | 0             | 0     | 0     | 0     | 0       | 0    | 0    | 0 | 0      | 0 | 0     | 1 | 1E-10 | 3E+06 | 3288       | 1E-10          | 1E-10 |                      |               |
| Hv20       | 0             | 0     | 1     | 3E-10         | 1     | 3E-10 | 1     | 1.6E-10 | 0    | 0    | 0 | 0      | 0 | 0     | 1 | 1E-10 | 0.5   | 3E+06      | 3168           | 3E-10 | 1E-10                |               |
| Hv21       | 1             | 2E-10 | 0     | 0             | 1     | 3E-10 | 1     | 1.7E-10 | 0    | 0    | 0 | 0      | 0 | 0     | 0 | 0     | 0.5   | 3E+06      | 3096           | 3E-10 | 0                    |               |
| Hv22       | 0             | 0     | 0     | 0             | 1     | 3E-10 | 0     | 0       | 0    | 0    | 0 | 0      | 0 | 0     | 0 | 0     | 0     | 3E+06      | 2832           | 1E-10 | 0                    |               |
| Hv23       | 1             | 2E-10 | 0     | 0             | 0     | 0     | 0     | 0       | 0    | 0    | 0 | 0      | 0 | 0     | 0 | 0     | 3E+06 | 3240       | 1E-10          | 0     |                      |               |
| Hv25       | 2             | 3E-10 | 0     | 0             | 0     | 0     | 2     | 3.1E-10 | 0    | 0    | 0 | 0      | 0 | 0     | 1 | 1E-10 | 1     | 3E+06      | 3360           | 4E-10 | 1E-10                |               |
| Hv26       | 0             | 0     | 1     | 3E-10         | 0     | 0     | 1     | 1.5E-10 | 0    | 0    | 1 | 2E-10  | 0 | 0     | 0 | 0     | 0.5   | 3E+06      | 3360           | 3E-10 | 0                    |               |
| Hv29       | 3             | 5E-10 | 0     | 0             | 0     | 0     | 1     | 1.6E-10 | 0    | 0    | 1 | 2E-10  | 0 | 0     | 0 | 0     | 1.5   | 3E+06      | 3168           | 5E-10 | 0                    |               |
| Hv30       | 1             | 2E-10 | 0     | 0             | 1     | 3E-10 | 1     | 1.5E-10 | 0    | 0    | 0 | 0      | 0 | 0     | 0 | 0     | 0.5   | 3E+06      | 3360           | 3E-10 | 0                    |               |
| Hv32       | 0             | 0     | 1     | 3E-10         | 1     | 3E-10 | 1     | 1.5E-10 | 0    | 0    | 0 | 0      | 0 | 0     | 0 | 0     | 0.5   | 3E+06      | 3312           | 3E-10 | 0                    |               |
| Hv33       | 5             | 8E-10 | 0     | 0             | 2     | 6E-10 | 2     | 3.2E-10 | 0    | 0    | 0 | 0      | 0 | 0     | 2 | 2E-10 | 1.25  | 3E+06      | 3240           | 9E-10 | 2E-10                |               |
| Hv34       | 1             | 2E-10 | 0     | 0             | 2     | 6E-10 | 1     | 1.5E-10 | 0    | 0    | 0 | 0      | 0 | 0     | 1 | 1E-10 | 0.33  | 3E+06      | 3336           | 4E-10 | 1E-10                |               |
| Hv35       | 0             | 0     | 0     | 0             | 0     | 0     | 2     | 3.1E-10 | 0    | 0    | 0 | 0      | 0 | 0     | 1 | 1E-10 | 0     | 3E+06      | 3288           | 2E-10 | 1E-10                |               |
| Hv41       | 0             | 0     | 0     | 0             | 0     | 0     | 0     | 0       | 0    | 0    | 1 | 2E-10  | 0 | 0     | 0 | 0     | 0     | 3E+06      | 3216           | 1E-10 | 0                    |               |
| Hv42       | 1             | 2E-10 | 0     | 0             | 1     | 3E-10 | 0     | 0       | 0    | 0    | 0 | 0      | 0 | 0     | 1 | 1E-10 | 1     | 3E+06      | 3192           | 2E-10 | 1E-10                |               |
| Hv43       | 3             | 5E-10 | 0     | 0             | 1     | 3E-10 | 0     | 0       | 0    | 0    | 0 | 0      | 0 | 0     | 0 | 0     | 3     | 3E+06      | 3360           | 4E-10 | 0                    |               |
| Hv44       | 1             | 2E-10 | 1     | 3E-10         | 0     | 0     | 0     | 0       | 0    | 0    | 0 | 0      | 1 | 1E-10 | 0 | 0     | 3E+06 | 2904       | 2E-10          | 1E-10 |                      |               |
| Hv45       | 3             | 5E-10 | 1     | 3E-10         | 0     | 0     | 1     | 1.6E-10 | 0    | 0    | 0 | 0      | 0 | 0     | 1 | 1E-10 | 4     | 3E+06      | 3120           | 5E-10 | 1E-10                |               |

|                 |       |       |    |       |    |       |    |         |   |       |   |       |   |       |    |       |      |       |      |       |       |
|-----------------|-------|-------|----|-------|----|-------|----|---------|---|-------|---|-------|---|-------|----|-------|------|-------|------|-------|-------|
| Hv46            | 1     | 2E-10 | 0  | 0     | 1  | 3E-10 | 2  | 3.1E-10 | 0 | 0     | 0 | 0     | 0 | 0     | 0  | 0     | 0.33 | 3E+06 | 3288 | 4E-10 | 0     |
| Hv47            | 1     | 2E-10 | 3  | 8E-10 | 2  | 6E-10 | 0  | 0       | 0 | 0     | 0 | 0     | 0 | 0     | 0  | 0     | 2    | 3E+06 | 3408 | 6E-10 | 0     |
| Hv48            | 0     | 0     | 1  | 3E-10 | 0  | 0     | 0  | 0       | 0 | 0     | 1 | 2E-10 | 0 | 0     | 1  | 1E-10 | 1    | 3E+06 | 3312 | 2E-10 | 1E-10 |
| Hv49            | 1     | 2E-10 | 3  | 9E-10 | 0  | 0     | 2  | 3.1E-10 | 0 | 0     | 0 | 0     | 0 | 0     | 0  | 0     | 2    | 3E+06 | 3336 | 6E-10 | 0     |
| Hv50            | 2     | 3E-10 | 0  | 0     | 1  | 3E-10 | 3  | 4.7E-10 | 0 | 0     | 0 | 0     | 0 | 0     | 0  | 0     | 0.5  | 3E+06 | 3408 | 6E-10 | 0     |
| Hv51            | 1     | 2E-10 | 0  | 0     | 1  | 3E-10 | 2  | 3.1E-10 | 0 | 0     | 0 | 0     | 0 | 0     | 0  | 0     | 0.33 | 3E+06 | 3288 | 4E-10 | 0     |
| Hv52            | 0     | 0     | 0  | 0     | 0  | 0     | 1  | 1.4E-10 | 0 | 0     | 0 | 0     | 0 | 0     | 0  | 0     | 0    | 3E+06 | 3600 | 9E-11 | 0     |
| Hv53            | 0     | 0     | 1  | 3E-10 | 0  | 0     | 0  | 0       | 0 | 0     | 0 | 0     | 0 | 0     | 0  | 0     |      | 3E+06 | 3456 | 1E-10 | 0     |
| Hv54            | 5     | 7E-10 | 0  | 0     | 0  | 0     | 0  | 0       | 0 | 0     | 0 | 0     | 0 | 0     | 0  | 0     |      | 3E+06 | 3528 | 5E-10 | 0     |
| Hv65            | 3     | 5E-10 | 1  | 3E-10 | 0  | 0     | 1  | 1.5E-10 | 0 | 0     | 0 | 0     | 0 | 0     | 0  | 0     | 4    | 3E+06 | 3384 | 5E-10 | 0     |
| Hv66            | 0     | 0     | 0  | 0     | 1  | 3E-10 | 0  | 0       | 0 | 0     | 0 | 0     | 0 | 0     | 0  | 0     | 0    | 3E+06 | 3336 | 1E-10 | 0     |
| Hv67            | 0     | 0     | 0  | 0     | 1  | 3E-10 | 0  | 0       | 0 | 0     | 0 | 0     | 0 | 0     | 0  | 0     | 0    | 3E+06 | 3168 | 1E-10 | 0     |
| Hv68            | 0     | 0     | 0  | 0     | 1  | 3E-10 | 0  | 0       | 0 | 0     | 0 | 0     | 0 | 0     | 0  | 0     |      | 3E+06 | 3216 | 1E-10 | 0     |
| Hv69            | 0     | 0     | 1  | 3E-10 | 1  | 3E-10 | 1  | 1.5E-10 | 0 | 0     | 0 | 0     | 0 | 0     | 0  | 0     | 0.5  | 3E+06 | 3336 | 3E-10 | 0     |
| Hv73            | 1     | 2E-10 | 0  | 0     | 0  | 0     | 0  | 0       | 0 | 0     | 0 | 0     | 0 | 0     | 0  | 0     |      | 3E+06 | 3096 | 1E-10 | 0     |
| Hv74            | 1     | 2E-10 | 1  | 3E-10 | 0  | 0     | 1  | 1.6E-10 | 0 | 0     | 0 | 0     | 0 | 0     | 0  | 0     | 2    | 3E+06 | 3192 | 3E-10 | 0     |
| Hv75            | 0     | 0     | 0  | 0     | 0  | 0     | 0  | 0       | 0 | 0     | 0 | 0     | 0 | 0     | 0  | 0     |      | 3E+06 | 3192 | 0     | 0     |
| Hv76            | 3     | 5E-10 | 0  | 0     | 2  | 6E-10 | 2  | 3.2E-10 | 0 | 0     | 0 | 0     | 0 | 0     | 0  | 0     | 0.75 | 3E+06 | 3168 | 7E-10 | 0     |
| Hv77            | 3     | 5E-10 | 0  | 0     | 1  | 3E-10 | 0  | 0       | 0 | 0     | 0 | 0     | 0 | 0     | 0  | 0     | 3    | 3E+06 | 3144 | 4E-10 | 0     |
| Hv79            | 2     | 3E-10 | 0  | 0     | 1  | 3E-10 | 0  | 0       | 0 | 0     | 0 | 0     | 0 | 0     | 0  | 0     | 2    | 3E+06 | 3168 | 3E-10 | 0     |
| Hv80            | 2     | 3E-10 | 1  | 3E-10 | 0  | 0     | 0  | 0       | 2 | 6E-10 | 0 | 0     | 0 | 0     | 0  | 0     | 1.5  | 3E+06 | 3000 | 6E-10 | 0     |
| Hv85            | 3     | 5E-10 | 0  | 0     | 0  | 0     | 1  | 1.7E-10 | 0 | 0     | 0 | 0     | 0 | 0     | 0  | 0     | 3    | 3E+06 | 3096 | 4E-10 | 0     |
| Hv86            | 1     | 2E-10 | 0  | 0     | 1  | 3E-10 | 0  | 0       | 0 | 0     | 0 | 0     | 0 | 0     | 0  | 0     | 1    | 3E+06 | 3096 | 2E-10 | 0     |
| Hv87            | 3     | 5E-10 | 1  | 3E-10 | 0  | 0     | 0  | 0       | 1 | 3E-10 | 0 | 0     | 1 | 1E-10 | 1  | 1E-10 | 4    | 3E+06 | 3312 | 5E-10 | 2E-10 |
| Hv88            | 2     | 3E-10 | 2  | 6E-10 | 0  | 0     | 0  | 0       | 0 | 0     | 0 | 0     | 0 | 0     | 0  | 0     |      | 3E+06 | 3432 | 4E-10 | 0     |
| Hv90            | 3     | 5E-10 | 0  | 0     | 1  | 3E-10 | 0  | 0       | 0 | 0     | 0 | 0     | 0 | 0     | 1  | 1E-10 | 3    | 3E+06 | 3144 | 4E-10 | 1E-10 |
| Hv98            | 3     | 5E-10 | 0  | 0     | 1  | 3E-10 | 0  | 0       | 1 | 3E-10 | 0 | 0     | 0 | 0     | 0  | 0     | 1.5  | 3E+06 | 3312 | 5E-10 | 0     |
|                 | 76    |       | 22 |       | 28 |       | 33 |         | 4 |       | 4 |       | 2 |       | 17 |       |      |       |      |       |       |
| Overall mut rat | 2E-10 |       |    | 1E-10 |    | 2E-10 |    | 9.6E-11 |   | 2E-11 |   | 1E-11 |   | 4E-12 |    | 3E-11 | 1.42 |       |      | 3E-10 | 4E-11 |
| lower limit     | 2E-10 |       |    | 7E-11 |    | 1E-10 |    | 6.6E-11 |   | 6E-12 |   | 3E-12 |   | 5E-13 |    | 2E-11 |      |       |      | 3E-10 | 2E-11 |
| upper limit     | 3E-10 |       |    | 2E-10 |    | 2E-10 |    | 1.3E-10 |   | 5E-11 |   | 3E-11 |   | 1E-11 |    | 5E-11 |      |       |      | 4E-10 | 6E-11 |
| SEM**           | 3E-11 |       |    | 3E-11 |    | 3E-11 |    | 1.7E-11 |   | 1E-11 |   | 6E-12 |   | 3E-12 |    | 8E-12 |      |       |      | 3E-11 | 8E-12 |

\*  $T_s/T_v$  is the transition/transversion ratio.

\*\* SEM is the standart error.
