# Supplementary material
Source: publisher figshare collection journal article supplement (https://gsajournals.figshare.com/articles/dataset/_/12411035)
Supplement: Supplementary file 4 [file 1]

Suppl. Table 9. Base substitution details

| MA Lines | Position       | Mutation | Genic region* | nino acid chan | Gene**      | Protein          | nonsyn/syn*** |
|----------|----------------|----------|---------------|----------------|-------------|------------------|---------------|
| Hv1      | _013964:13993  | C>T      | Coding        | Ala225Ala      | dppC13      | ABC-type trans   | syn           |
| Hv1      | _013967:16683  | C>T      | NonCoding     |                |             |                  |               |
| Hv1      | _013967:25676  | C>A      | NonCoding     |                |             |                  |               |
| Hv1      | _013968.1:815  | G>A      | Coding        | Asp99Asp       | HVO_RS19610 | hypothetical     | syn           |
| Hv2      | _013966:26315  | G>A      | NonCoding     |                |             |                  |               |
| Hv2      | _013967:10447  | G>A      | Coding        | Ala112Val      | pssA        | CDP-diacylglyc   | nonsyn        |
| Hv2      | _013967:13245  | A>G      | Coding        | Glu277Gly      | HVO_1452    | Citrate-lyase (E | nonsyn        |
| Hv2      | _013967:13286  | T>C      | Coding        | Arg163Arg      | HVO_1456    | HTR-like protei  | syn           |
| Hv5      | _013967:93748  | C>T      | Coding        | Val90Met       | HVO_1028    | Putative oxido   | nonsyn        |
| Hv8      | _013967:6336   | G>A      | NonCoding     |                |             |                  |               |
| Hv8      | _013967:69639  | C>T      | NonCoding     |                |             |                  |               |
| Hv16     | _013964:33734  | G>A      | NonCoding     |                |             |                  |               |
| Hv16     | _013967:27926  | G>A      | Coding        | Ala36Thr       | HVO_2956    | Uncharacterize   | nonsyn        |
| Hv17     | _013967:71098  | G>T      | NonCoding     |                |             |                  |               |
| Hv18     | _013966:39471  | G>A      | Coding        | Gly260Ser      | dppC8       | ABC-type trans   | nonsyn        |
| Hv18     | _013967:12828  | C>A      | NonCoding     |                |             |                  |               |
| Hv18     | _013967:21185  | A>T      | Coding        | Gly280Gly      | HVO_2259    | XerC/D-like int  | syn           |
| Hv18     | _013967:28373  | G>A      | Coding        | Arg58Cys       | htr15b      | Transducer pro   | nonsyn        |
| Hv19     | _013967:24796  | G>A      | Coding        | Arg36Arg       | htlC        | Htr-like protei  | syn           |
| Hv20     | _013967:16751  | T>A      | Coding        | Lys89Asn       | tatCt       | Sec-independe    | nonsyn        |
| Hv20     | _013967:15562  | G>T      | Coding        | Gly95Val       | HVO_1697    | FAD-dependen     | nonsyn        |
| Hv20     | _013967:16482  | A>G      | Coding        | Asp91Gly       | HVO_1781    | Uncharacterize   | nonsyn        |
| Hv21     | _013967:59304  | G>T      | NonCoding     |                |             |                  |               |
| Hv21     | _013967:11825  | G>A      | Coding        | Lys239Lys      | HVO_1298    | Adaptive-respo   | syn           |
| Hv21     | _013967:18110  | A>T      | NonCoding     |                |             |                  |               |
| Hv22     | _013966:38015  | T>A      | NonCoding     |                |             |                  |               |
| Hv23     | _013967:28299  | G>A      | Coding        | His321Tyr      | metY1       | O-acetylhomos    | nonsyn        |
| Hv25     | _013966:49053  | C>A      | NonCoding     |                |             |                  |               |
| Hv25     | _013967:12017  | G>A      | Coding        | Leu31Leu       | HVO_1316    | Uncharacterize   | syn           |
| Hv25     | _013967:19333  | G>A      | Coding        | Thr118Thr      | HVO_2078    | DUF304 domai     | syn           |
| Hv25     | _013967:28445  | G>T      | NonCoding     |                |             |                  |               |
| Hv26     | _013968:8331   | G>T      | NonCoding     |                |             |                  |               |
| Hv26     | _013966:2109   | G>C      | Coding        | Glu85Asp       | HVO_A0019   | OB-fold nucleic  | nonsyn        |
| Hv26     | _013967:91290  | A>G      | NonCoding     |                |             |                  |               |
| Hv29     | _013966:43390  | C>T      | Coding        | Ser69Asn       | dppA9       | ABC-type trans   | nonsyn        |
| Hv29     | _013967:79341  | G>T      | Coding        | Lys287Asn      | epf1        | mRNA 3-end p     | nonsyn        |
| Hv29     | _013967:14833  | G>A      | Coding        | Thr28Thr       | HVO_1614    | Uncharacterize   | syn           |
| Hv29     | _013967:19973  | C>G      | Coding        | Arg156Pro      | fbp2        | Fructose-1,6-b   | nonsyn        |
| Hv29     | _013966.1:4339 | C>T      | Coding        | Ser69Ser       | HVO_RS03750 | ABC-transport    | syn           |
| Hv30     | _013966:25587  | G>T      | Coding        | Ala331Ser      | HVO_A0254   | Conserved pro    | nonsyn        |
| Hv30     | _013967.1:9207 | G>A      | NonCoding     |                |             |                  |               |
| Hv30     | _013967:10243  | A>T      | NonCoding     |                |             |                  |               |

|      |                 |     |           |            |             |                  |             |
|------|-----------------|-----|-----------|------------|-------------|------------------|-------------|
| Hv32 | _013967:6747C   | G>T | Coding    | Asp302Tyr  | HVO_0753    | Uncharacterize   | nonsyn      |
| Hv32 | _013967:15955   | T>C | Coding    | Ser272Pro  | orc5        | ORC1-type DN     | nonsyn      |
| Hv32 | _013967:27384   | A>T | NonCoding |            |             |                  |             |
| Hv33 | _013966:32376   | T>C | NonCoding |            |             |                  |             |
| Hv33 | _013966:38537   | C>A | Coding    | Cys354Phe  | HVO_A0376   | Xaa-Pro amino    | nonsyn      |
| Hv33 | _013967:92743   | G>T | Coding    | Arg511Leu  | HVO_1018    | RecJ domain p    | nonsyn      |
| Hv33 | _013967:12120   | C>T | Coding    | Glu877Lys  | lhr2        | ATP-dependen     | nonsyn      |
| Hv33 | _013967:13489   | T>A | Coding    | Ile191Asn  | tfb5        | Transcription i  | nonsyn      |
| Hv33 | _013967:14049   | C>T | NonCoding |            |             |                  |             |
| Hv33 | _013967:18641   | T>A | NonCoding |            |             |                  |             |
| Hv33 | _013967:20300   | C>T | Coding    | Thr1618Met | HVO_2160    | Uncharacterize   | nonsyn      |
| Hv33 | _013966.1:1104  | G>A | Coding    | Tyr184Tyr  | hvo_rs01910 | hypothetical     |             |
| Hv34 | _013964:13663   | T>A | Coding    | Ser9Thr    | dppA13      | ABC-type trans   | nonsyn      |
| Hv34 | _013964:36835   | C>A | NonCoding |            |             |                  |             |
| Hv34 | _013966:50405   | G>A | Coding    | Ala201Val  | boa7        | Bacterio-opsin   | nonsyn      |
| Hv34 | _013967:50283   | T>A | NonCoding |            |             |                  |             |
| Hv35 | _013966:6877    | G>T | Coding    | Ala648Ser  | HVO_A0074   | Uncharacterize   | nonsyn      |
| Hv35 | _013967:23745   | G>T | Coding    | Val289Phe  | carA        | Carbamoyl-pho    | nonsyn      |
| Hv41 | _013966:13714   | C>G | Coding    | Glu283Asp  | ltrC3       | LtrC-like protei | nonsyn      |
| Hv42 | _013967:6683    | A>T | Coding    | Arg929Ser  | polD2       | DNA polymera     | nonsyn      |
| Hv42 | _013967:62433   | C>T | Coding    | Val166Ile  | HVO_0693    | Auxin permeas    | nonsyn      |
| Hv43 | _013967:16242   | C>T | NonCoding |            |             |                  |             |
| Hv43 | _013967:19276   | G>A | NonCoding |            |             |                  |             |
| Hv43 | _013967:25587   | G>A | Coding    | Glu285Lys  | rtcB        | tRNA-splicing l  | nonsyn      |
| Hv43 | _013967:28309   | A>T | NonCoding |            |             |                  |             |
| Hv44 | _013966:32363   | T>C | NonCoding |            |             |                  |             |
| Hv44 | _013967:41511   | C>T | Coding    | Val388Val  | HVO_0465    | DNA damage-i     | syn         |
| Hv45 | _013964:1411    | G>T | Coding    | Glu197*    | gcvT1       | Sacrosine dehy   | stop_gained |
| Hv45 | _013964:23366   | A>G | NonCoding |            |             |                  |             |
| Hv45 | _013964:25526   | G>A | Coding    | Glu40Glu   | HVO_B0216   | Uncharacterize   | syn         |
| Hv45 | _013967:14673   | G>A | Coding    | Arg294His  | HVO_0160    | CAAX amino te    | nonsyn      |
| Hv45 | _013967:14376   | C>T | Coding    | Arg359His  | top6A       | Type 2 DNA to    | nonsyn      |
| Hv46 | _013964:28842   | C>A | Coding    | Gly182Trp  | HVO_B0241   | IS1341-type tri  | nonsyn      |
| Hv46 | _013967:12405   | G>T | Coding    | Leu82Ile   | HVO_1361    | UPF0721 trans    | nonsyn      |
| Hv46 | _013967:21649   | C>T | Coding    | Asp109Asn  | HVO_2295    | Cationic aminc   | nonsyn      |
| Hv46 | _013967.1:27015 | A>T | Coding    | His15Leu   | HVO_RS18545 | DUF211 domi      | nonsyn      |
| Hv47 | _013966:14588   | T>A | NonCoding |            |             |                  |             |
| Hv47 | _013966:31348   | A>G | Coding    | Gly5Gly    | HVO_A0301   | Polysaccharide   | syn         |
| Hv47 | _013967:37144   | A>G | NonCoding |            |             |                  |             |
| Hv47 | _013967:12918   | A>G | Coding    | Ile396Thr  | HVO_1417    | DUF318 family    | nonsyn      |
| Hv47 | _013967.1:14075 | T>A | Coding    | Ala206Ala  | glpB        | glycerol-3-pho   | syn         |
| Hv47 | _013967:16448   | G>A | Coding    | Ala704Thr  | katG        | Catalase-perox   | nonsyn      |
| Hv48 | _013964:38435   | A>G | NonCoding |            |             |                  |             |
| Hv48 | _013967:13013   | G>C | Coding    | Ala96Ala   | HVO_1428    | Homolog to ph    | syn         |
| Hv49 | _013964:5530    | T>C | NonCoding |            |             |                  |             |

|      |                 |     |           |            |             |                                 |             |
|------|-----------------|-----|-----------|------------|-------------|---------------------------------|-------------|
| Hv49 | _013967:70165   | C>T | Coding    | Ala44Thr   | HVO_0781    | NAD operon pr                   | nonsyn      |
| Hv49 | _013967:12744   | C>A | Coding    | Pro513Pro  | tsgD11      | ABC-type trans                  | syn         |
| Hv49 | _013967:19629   | T>C | NonCoding |            |             |                                 |             |
| Hv49 | _013967:24434   | C>A | Coding    | Glu68*     | HVO_2592    | DsbA family pr                  | stop_gained |
| Hv49 | _013967:25772   | A>G | Coding    | Thr537Ala  | etfA2       | Electron transf                 | nonsyn      |
| Hv50 | _013964:18817   | G>A | Coding    | Ser204Ser  | qcrB        | Menaquinol-cy                   | syn         |
| Hv50 | _013964:25628   | C>A | Coding    | Ala380Glu  | HVO_B0216   | Uncharacterize                  | nonsyn      |
| Hv50 | _013966:60366   | G>T | NonCoding |            |             |                                 |             |
| Hv50 | _013967:55166   | G>T | Coding    | Arg322Ser  | pilB1       | Type IV pilus b                 | nonsyn      |
| Hv50 | _013967:24275   | G>A | Coding    | Tyr184Tyr  | HVO_2576    | DnaJ domain p                   | syn         |
| Hv50 | _013967:27725   | T>A | Coding    | Lys64Asn   | mc1B        | Nonhistone ch                   | nonsyn      |
| Hv51 | _013966:51674   | C>T | Coding    | Val330Ile  | aldY5       | Aldehyde dehy                   | nonsyn      |
| Hv51 | _013966:54570   | C>A | Coding    | Val80Val   | HVO_A0541   | ABC-type trans                  | syn         |
| Hv51 | _013967:79671   | T>A | Coding    | Asp23Val   | nthB        | Endonuclease                    | nonsyn      |
| Hv51 | _013967:25028   | G>T | Coding    | Ala311Asp  | HVO_2654    | Cytochrome B6                   | nonsyn      |
| Hv52 | _013967:22728   | G>T | Coding    | Ser130*    | gcvT        | Probable amin                   | stop_gained |
| Hv53 | _013966:32397   | T>C | NonCoding |            |             |                                 |             |
| Hv54 | _013968:3983    | G>A | Coding    | Ala435Ala  | HVO_C0042   | Putative helica                 | syn         |
| Hv54 | _013964:29193   | C>T | Coding    | Ala346Val  | aor1        | Aldehyde ferre                  | nonsyn      |
| Hv54 | _013967:14019   | C>T | Coding    | Gly165Asp  | HVO_1534    | Methyltransfe                   | nonsyn      |
| Hv54 | _013967:18818   | C>T | NonCoding |            |             |                                 |             |
| Hv54 | _013967:23297   | G>A | Coding    | Ala39Ala   | gul         | Inosine-5-mon                   | syn         |
| Hv65 | _013966:10685   | G>A | Coding    | Ala8Ala    | HVO_A0101   | Uncharacterize                  | syn         |
| Hv65 | _013966:52877   | G>A | Coding    | Val212Ile  | hbd4        | 3-hydroxyacyl-                  | nonsyn      |
| Hv65 | _013967:24024   | G>A | Coding    | Gly254Gly  | HVO_0271    | Homolog to vir                  | syn         |
| Hv65 | _013967:98218   | G>T | Coding    | Ala137Ser  | graD1       | Sugar nucleoti                  | nonsyn      |
| Hv65 | _013967:15462   | T>C | NonCoding |            |             |                                 |             |
| Hv66 | _013967:15401   | T>A | Coding    | Asp77Val   | malQ        | 4-alpha-glucan                  | nonsyn      |
| Hv67 | _013968:8489    | T>A | Coding    | Glu48Val   | HVO_C0089   | Uncharacterize                  | nonsyn      |
| Hv68 | _013967:1:15974 | T>A | Coding    | Glu22Val   | HVO_RS13010 | TATA-box-bin                    | nonsyn      |
| Hv69 | _013968:4169    | C>A | Coding    | Leu1056Ile | HVO_C0042   | Putative helica                 | nonsyn      |
| Hv69 | _013967:15410   | T>C | Coding    | Val139Ala  | thrS        | Threonine--tr                   | nonsyn      |
| Hv69 | _013967:21704   | A>T | Coding    | Val402Asp  | HVO_2302    | Putative ubiqu                  | nonsyn      |
| Hv73 | _013964:26492   | G>A | NonCoding |            |             |                                 |             |
| Hv74 | _013966:42351   | T>C | Coding    | Asn4Asn    | HVO_A0419   | Nucleotidyltra                  | syn         |
| Hv74 | _013967:26371   | C>A | Coding    | Gly63Cys   | HVO_2806    | Uncharacterize                  | nonsyn      |
| Hv74 | _013967:1:11438 | C>T | Coding    | Val180Met  | HVO_RS10740 | DUF58 domain-containing protein |             |
| Hv76 | _013967:1:5021  | C>A | Coding    | Gly313Asp  | HVO_RS04945 | cation:proton antiporter        |             |
| Hv76 | _013967:52562   | C>T | NonCoding |            |             |                                 |             |
| Hv76 | _013967:86807   | A>T | Coding    | Thr50Thr   | HVO_0959    | Uncharacterize                  | syn         |
| Hv76 | _013967:15182   | G>A | Coding    | Thr148Thr  | cysK2       | Cysteine synth                  | syn         |
| Hv76 | _013967:23411   | T>A | Coding    | Leu389His  | nac         | Nascent polyp                   | nonsyn      |
| Hv76 | _013966:1:6314  | C>T | NonCoding |            |             |                                 |             |
| Hv76 | _013964:1:3405  | G>T | NonCoding |            |             |                                 |             |
| Hv77 | _013964:23945   | C>T | Coding    | Pro334Pro  | lccA        | Laccase (EC 1.1                 | syn         |

|      |               |     |           |           |           |                 |             |
|------|---------------|-----|-----------|-----------|-----------|-----------------|-------------|
| Hv77 | _013964:4088C | G>A | Coding    | Arg547Cys | HVO_B0354 | Uncharacterize  | nonsyn      |
| Hv77 | _013966:2020A | A>T | Coding    | Leu208*   | HVO_A0198 | Uncharacterize  | stop_gained |
| Hv77 | _013966:3372C | C>T | Coding    | Ala429Ala | bgaH      | Beta-D-galacto  | syn         |
| Hv79 | _013967:6550  | G>A | Coding    | Ser488Ser | polD2     | DNA polymera    | syn         |
| Hv79 | _013967:8981A | A>T | Coding    | Gly506Gly | nuoM      | NADH dehydrc    | syn         |
| Hv79 | _013967:1197A | C>T | Coding    | Ala186Thr | HVO_1311  | Putative oxido  | nonsyn      |
| Hv80 | _013966:3014A | T>G | NonCoding |           |           |                 |             |
| Hv80 | _013966:3768T | T>G | Coding    | Ile35Ser  | HVO_A0365 | Uncharacterize  | nonsyn      |
| Hv80 | _013967:1284G | G>A | Coding    | Gly192Ser | HVO_1410  | Uncharacterize  | nonsyn      |
| Hv80 | _013967:1744C | C>T | Coding    | Ala42Thr  | HVO_1893  | Ham1 family p   | nonsyn      |
| Hv80 | _013967:2794A | A>G | NonCoding |           |           |                 |             |
| Hv85 | _013966:2296G | G>A | Coding    | Met401Ile | HVO_A0222 | Uncharacterize  | nonsyn      |
| Hv85 | _013967:1143C | C>T | Coding    | Val180Met | HVO_1256  | Uncharacterize  | nonsyn      |
| Hv85 | _013967:2067C | C>A | Coding    | Ala80Asp  | HVO_2199  | Uncharacterize  | nonsyn      |
| Hv85 | _013967:2072G | G>A | Coding    | Ala151Val | ftsZ4     | Tubulin-like pr | nonsyn      |
| Hv86 | _013967:8173G | G>A | Coding    | Pro80Pro  | livJ1     | ABC-type trans  | syn         |
| Hv86 | _013967:2554A | A>T | Coding    | Ser20Thr  | HVO_2707  | GFO family oxi  | nonsyn      |
| Hv87 | _013964:4173C | C>T | Coding    | Arg114Gln | HVO_B0360 | Uncharacterize  | nonsyn      |
| Hv87 | _013966:989A  | A>C | NonCoding |           |           |                 |             |
| Hv87 | _013967:7711G | G>A | Coding    | Arg251His | polB1     | DNA polymera    | nonsyn      |
| Hv87 | _013967:1510C | C>T | Coding    | Gly89Gly  | HVO_1647  | Cytochrome C    | syn         |
| Hv87 | _013967:2574A | A>G | NonCoding |           |           |                 |             |
| Hv88 | _013966:1119G | G>A | Coding    | Asp135Asp | HVO_A0010 | Uncharacterize  | syn         |
| Hv88 | _013966:1121T | T>C | Coding    | Glu129Glu | HVO_A0010 | Uncharacterize  | syn         |
| Hv88 | _013967:5727C | C>T | Coding    | Arg190*   | HVO_0636  | Uncharacterize  | stop_gained |
| Hv88 | _013967:1317A | A>G | NonCoding |           |           |                 |             |
| Hv90 | _013967:6041C | C>T | Coding    | Gly223Arg | dppB1     | ABC-type trans  | nonsyn      |
| Hv90 | _013967:6241G | G>A | Coding    | Ser240Leu | dppA1     | ABC-type trans  | nonsyn      |
| Hv90 | _013967:4755A | G>A | Coding    | Thr276Thr | HVO_0544  | Galactose-prot  | syn         |
| Hv90 | _013967:1339T | T>A | Coding    | Glu504Val | menD      |                 | nonsyn      |
| Hv98 | _013967:7433G | G>A | Coding    | Ala170Thr | HVO_0823  | DUF420 family   | nonsyn      |
| Hv98 | _013967:9567T | T>G | NonCoding |           |           |                 |             |
| Hv98 | _013967:1127C | C>T | Coding    | Arg260His | acs3      | Acyl-CoA synth  | nonsyn      |
| Hv98 | _013967:2265A | A>T | Coding    | Tyr4Asn   | HVO_2395  | ATP:cob(I)alarr | nonsyn      |
| Hv98 | _013967:4734C | C>T | Coding    | Pro40Pro  | acnA      | Aconitate hydr  | syn         |

\*Noncoding - noncoding sequence, Coding - coding sequence. \*\* Gene is the gene name or type of gene where the base substitution occurs.\*\*\* syn - synonymous, nonsyn - nonsynonymous.
