# Supplementary material
Source: publisher figshare collection journal article supplement (https://gsajournals.figshare.com/articles/dataset/_/12411035)
Supplement: Supplementary file 5 [file 1]

Suppl. Table 5. *Haloferax volcanii* main chromosome base substitution and inserion-deletion (indel) summary statistics

| MA<br>Line | Substitutions |          |       |         |       |       |               |       |   |   |   | Indels |      |   |   | Total<br>sites | Gen.  | Base-<br>sub<br>Rate | Indel<br>Rate |       |
|------------|---------------|----------|-------|---------|-------|-------|---------------|-------|---|---|---|--------|------|---|---|----------------|-------|----------------------|---------------|-------|
|            | Transitions   |          |       |         |       |       | Transversions |       |   |   |   | Ins.   | Del. |   |   |                |       |                      |               |       |
|            | GC>AT         | AT>GC    | AT>TA | GC>TA   | AT>CG | GC>CG |               |       |   |   |   |        |      |   |   |                |       |                      |               |       |
| Hv1        | 1             | 2.53E-10 | 0     | 0       | 0     | 0     | 1             | 3E-10 | 0 | 0 | 0 | 0      | 0    | 0 | 1 | 0              | 2E+06 | 3384                 | 3E-10         | 2E-10 |
| Hv2        | 1             | 2.48E-10 | 2     | 9.3E-10 | 0     | 0     | 0             | 0     | 0 | 0 | 0 | 0      | 0    | 0 | 0 | 0              | 2E+06 | 3456                 | 5E-10         | 0     |
| Hv4        | 0             | 0        | 0     | 0       | 0     | 0     | 0             | 0     | 0 | 0 | 0 | 0      | 0    | 0 | 0 | 0              | 2E+06 | 3456                 | 0             | 0     |
| Hv5        | 1             | 2.48E-10 | 0     | 0       | 0     | 0     | 0             | 0     | 0 | 0 | 0 | 0      | 0    | 0 | 0 | 0              | 2E+06 | 3456                 | 2E-10         | 0     |
| Hv7        | 0             | 0        | 0     | 0       | 0     | 0     | 0             | 0     | 0 | 0 | 0 | 0      | 0    | 0 | 1 | 0              | 2E+06 | 3072                 | 0             | 2E-10 |
| Hv8        | 2             | 5.06E-10 | 0     | 0       | 0     | 0     | 0             | 0     | 0 | 0 | 0 | 0      | 0    | 0 | 0 | 0              | 2E+06 | 3384                 | 3E-10         | 0     |
| Hv16       | 1             | 2.44E-10 | 0     | 0       | 0     | 0     | 0             | 0     | 0 | 0 | 0 | 0      | 0    | 0 | 0 | 0              | 2E+06 | 3504                 | 2E-10         | 0     |
| Hv17       | 0             | 0        | 0     | 0       | 0     | 0     | 1             | 2E-10 | 0 | 0 | 0 | 0      | 0    | 0 | 0 | 0              | 2E+06 | 3528                 | 2E-10         | 0     |
| Hv18       | 1             | 2.58E-10 | 0     | 0       | 1     | 5E-10 | 1             | 3E-10 | 0 | 0 | 0 | 0      | 0    | 0 | 2 | 0              | 2E+06 | 3312                 | 5E-10         | 3E-10 |
| Hv19       | 1             | 2.6E-10  | 0     | 0       | 0     | 0     | 0             | 0     | 0 | 0 | 0 | 0      | 0    | 0 | 0 | 0              | 2E+06 | 3288                 | 2E-10         | 0     |
| Hv20       | 0             | 0        | 1     | 5.1E-10 | 1     | 5E-10 | 1             | 3E-10 | 0 | 0 | 0 | 0      | 0    | 0 | 0 | 0              | 2E+06 | 3168                 | 5E-10         | 0     |
| Hv21       | 1             | 2.77E-10 | 0     | 0       | 1     | 5E-10 | 1             | 3E-10 | 0 | 0 | 0 | 0      | 0    | 0 | 0 | 0              | 2E+06 | 3096                 | 5E-10         | 0     |
| Hv22       | 0             | 0        | 0     | 0       | 0     | 0     | 0             | 0     | 0 | 0 | 0 | 0      | 0    | 0 | 0 | 0              | 2E+06 | 2832                 | 0             | 0     |
| Hv23       | 1             | 2.64E-10 | 0     | 0       | 0     | 0     | 0             | 0     | 0 | 0 | 0 | 0      | 0    | 0 | 0 | 0              | 2E+06 | 3240                 | 2E-10         | 0     |
| Hv25       | 2             | 3.19E-10 | 0     | 0       | 0     | 0     | 1             | 2E-10 | 0 | 0 | 0 | 0      | 0    | 0 | 1 | 0              | 3E+06 | 3360                 | 3E-10         | 1E-10 |
| Hv26       | 0             | 0        | 1     | 4.8E-10 | 0     | 0     | 0             | 0     | 0 | 0 | 0 | 0      | 0    | 0 | 0 | 0              | 2E+06 | 3360                 | 2E-10         | 0     |
| Hv29       | 1             | 2.7E-10  | 0     | 0       | 0     | 0     | 1             | 3E-10 | 0 | 0 | 1 | 3E-10  | 0    | 0 | 0 | 0              | 2E+06 | 3168                 | 5E-10         | 0     |
| Hv30       | 1             | 2.55E-10 | 0     | 0       | 1     | 5E-10 | 0             | 0     | 0 | 0 | 0 | 0      | 0    | 0 | 0 | 0              | 2E+06 | 3360                 | 2E-10         | 0     |
| Hv32       | 0             | 0        | 1     | 4.8E-10 | 1     | 5E-10 | 1             | 3E-10 | 0 | 0 | 0 | 0      | 0    | 0 | 0 | 0              | 2E+06 | 3312                 | 5E-10         | 0     |
| Hv33       | 3             | 7.93E-10 | 0     | 0       | 2     | 1E-09 | 1             | 3E-10 | 0 | 0 | 0 | 0      | 0    | 0 | 1 | 0              | 2E+06 | 3240                 | 1E-09         | 2E-10 |
| Hv34       | 0             | 0        | 0     | 0       | 1     | 5E-10 | 0             | 0     | 0 | 0 | 0 | 0      | 0    | 0 | 1 | 0              | 2E+06 | 3336                 | 2E-10         | 2E-10 |
| Hv35       | 0             | 0        | 0     | 0       | 0     | 0     | 1             | 3E-10 | 0 | 0 | 0 | 0      | 0    | 0 | 1 | 0              | 2E+06 | 3288                 | 2E-10         | 2E-10 |
| Hv41       | 0             | 0        | 0     | 0       | 0     | 0     | 0             | 0     | 0 | 0 | 0 | 0      | 0    | 0 | 0 | 0              | 2E+06 | 3216                 | 0             | 0     |
| Hv42       | 1             | 2.68E-10 | 0     | 0       | 1     | 5E-10 | 0             | 0     | 0 | 0 | 0 | 0      | 0    | 0 | 0 | 0              | 2E+06 | 3192                 | 3E-10         | 0     |
| Hv43       | 3             | 7.64E-10 | 0     | 0       | 1     | 5E-10 | 0             | 0     | 0 | 0 | 0 | 0      | 0    | 0 | 0 | 0              | 2E+06 | 3360                 | 7E-10         | 0     |
| Hv44       | 1             | 2.95E-10 | 0     | 0       | 0     | 0     | 0             | 0     | 0 | 0 | 0 | 0      | 1    | 0 | 0 | 0              | 2E+06 | 2904                 | 2E-10         | 2E-10 |
| Hv45       | 2             | 5.49E-10 | 0     | 0       | 0     | 0     | 0             | 0     | 0 | 0 | 0 | 0      | 0    | 0 | 1 | 0              | 2E+06 | 3120                 | 4E-10         | 2E-10 |
| Hv46       | 1             | 2.6E-10  | 0     | 0       | 1     | 5E-10 | 1             | 3E-10 | 0 | 0 | 0 | 0      | 0    | 0 | 0 | 0              | 2E+06 | 3288                 | 3E-10         | 0     |
| Hv47       | 1             | 2.51E-10 | 2     | 9.4E-10 | 1     | 5E-10 | 0             | 0     | 0 | 0 | 0 | 0      | 0    | 0 | 0 | 0              | 2E+06 | 3408                 | 5E-10         | 0     |
| Hv48       | 0             | 0        | 0     | 0       | 0     | 0     | 0             | 0     | 0 | 0 | 1 | 3E-10  | 0    | 0 | 0 | 0              | 2E+06 | 3312                 | 2E-10         | 0     |
| Hv49       | 1             | 2.57E-10 | 2     | 9.6E-10 | 0     | 0     | 2             | 5E-10 | 0 | 0 | 0 | 0      | 0    | 0 | 0 | 0              | 2E+06 | 3336                 | 8E-10         | 0     |
| Hv50       | 1             | 2.51E-10 | 0     | 0       | 1     | 5E-10 | 1             | 3E-10 | 0 | 0 | 0 | 0      | 0    | 0 | 0 | 0              | 2E+06 | 3408                 | 5E-10         | 0     |
| Hv51       | 0             | 0        | 0     | 0       | 1     | 5E-10 | 1             | 3E-10 | 0 | 0 | 0 | 0      | 0    | 0 | 0 | 0              | 2E+06 | 3288                 | 3E-10         | 0     |
| Hv52       | 0             | 0        | 0     | 0       | 0     | 0     | 1             | 1E-10 | 0 | 0 | 0 | 0      | 0    | 0 | 0 | 0              | 3E+06 | 3600                 | 1E-10         | 0     |
| Hv53       | 0             | 0        | 0     | 0       | 0     | 0     | 0             | 0     | 0 | 0 | 0 | 0      | 0    | 0 | 0 | 0              | 2E+06 | 3456                 | 0             | 0     |
| Hv54       | 3             | 7.28E-10 | 0     | 0       | 0     | 0     | 0             | 0     | 0 | 0 | 0 | 0      | 0    | 0 | 0 | 0              | 2E+06 | 3528                 | 5E-10         | 0     |
| Hv65       | 1             | 2.53E-10 | 1     | 4.7E-10 | 0     | 0     | 1             | 3E-10 | 0 | 0 | 0 | 0      | 0    | 0 | 0 | 0              | 2E+06 | 3384                 | 5E-10         | 0     |
| Hv66       | 0             | 0        | 0     | 0       | 1     | 5E-10 | 0             | 0     | 0 | 0 | 0 | 0      | 0    | 0 | 0 | 0              | 2E+06 | 3336                 | 2E-10         | 0     |
| Hv67       | 0             | 0        | 0     | 0       | 0     | 0     | 0             | 0     | 0 | 0 | 0 | 0      | 0    | 0 | 0 | 0              | 2E+06 | 3168                 | 0             | 0     |

|                |          |          |    |         |    |       |    |       |   |         |   |       |   |   |    |   |       |      |       |       |
|----------------|----------|----------|----|---------|----|-------|----|-------|---|---------|---|-------|---|---|----|---|-------|------|-------|-------|
| Hv68           | 0        | 0        | 0  | 0       | 1  | 5E-10 | 0  | 0     | 0 | 0       | 0 | 0     | 0 | 0 | 0  | 0 | 2E+06 | 3216 | 0     | 0     |
| Hv69           | 0        | 0        | 1  | 4.8E-10 | 1  | 5E-10 | 0  | 0     | 0 | 0       | 0 | 0     | 0 | 0 | 0  | 0 | 2E+06 | 3336 | 3E-10 | 0     |
| Hv73           | 0        | 0        | 0  | 0       | 0  | 0     | 0  | 0     | 0 | 0       | 0 | 0     | 0 | 0 | 0  | 0 | 2E+06 | 3096 | 0     | 0     |
| Hv74           | 1        | 2.68E-10 | 0  | 0       | 0  | 0     | 1  | 3E-10 | 0 | 0       | 0 | 0     | 0 | 0 | 0  | 0 | 2E+06 | 3192 | 2E-10 | 0     |
| Hv75           | 0        | 0        | 0  | 0       | 0  | 0     | 0  | 0     | 0 | 0       | 0 | 0     | 0 | 0 | 0  | 0 | 2E+06 | 3192 | 0     | 0     |
| Hv76           | 2        | 5.4E-10  | 0  | 0       | 2  | 1E-09 | 1  | 3E-10 | 0 | 0       | 0 | 0     | 0 | 0 | 0  | 0 | 2E+06 | 3168 | 7E-10 | 0     |
| Hv77           | 0        | 0        | 0  | 0       | 0  | 0     | 0  | 0     | 0 | 0       | 0 | 0     | 0 | 0 | 0  | 0 | 2E+06 | 3144 | 0     | 0     |
| Hv79           | 2        | 5.4E-10  | 0  | 0       | 1  | 5E-10 | 0  | 0     | 0 | 0       | 0 | 0     | 0 | 0 | 0  | 0 | 2E+06 | 3168 | 5E-10 | 0     |
| Hv80           | 2        | 5.71E-10 | 1  | 5.3E-10 | 0  | 0     | 0  | 0     | 0 | 0       | 0 | 0     | 0 | 0 | 0  | 0 | 2E+06 | 3000 | 6E-10 | 0     |
| Hv85           | 2        | 3.46E-10 | 0  | 0       | 0  | 0     | 1  | 2E-10 | 0 | 0       | 0 | 0     | 0 | 0 | 0  | 0 | 3E+06 | 3096 | 3E-10 | 0     |
| Hv86           | 1        | 2.77E-10 | 0  | 0       | 1  | 5E-10 | 0  | 0     | 0 | 0       | 0 | 0     | 0 | 0 | 0  | 0 | 2E+06 | 3096 | 4E-10 | 0     |
| Hv87           | 2        | 5.17E-10 | 1  | 4.8E-10 | 0  | 0     | 0  | 0     | 0 | 0       | 0 | 0     | 1 | 0 | 1  | 0 | 2E+06 | 3312 | 5E-10 | 3E-10 |
| Hv88           | 1        | 2.49E-10 | 1  | 4.7E-10 | 0  | 0     | 0  | 0     | 0 | 0       | 0 | 0     | 0 | 0 | 0  | 0 | 2E+06 | 3432 | 3E-10 | 0     |
| Hv90           | 3        | 8.17E-10 | 0  | 0       | 1  | 5E-10 | 0  | 0     | 0 | 0       | 0 | 0     | 0 | 0 | 1  | 0 | 2E+06 | 3144 | 7E-10 | 2E-10 |
| Hv98           | 3        | 7.75E-10 | 0  | 0       | 1  | 5E-10 | 0  | 0     | 1 | 4.8E-10 | 0 | 0     | 0 | 0 | 0  | 0 | 2E+06 | 3312 | 8E-10 | 0     |
|                | 51       |          | 14 |         | 23 |       | 20 |       | 1 |         | 2 |       | 2 |   | 11 |   |       |      |       |       |
| Overall mut ra | 2.39E-10 |          |    | 1.2E-10 |    | 2E-10 |    | 9E-11 |   | 8.8E-12 |   | 9E-12 |   | 0 |    | 0 |       |      | 3E-10 | 4E-11 |
| lower limit    | 1.78E-10 |          |    | 6.8E-11 |    | 1E-10 |    | 6E-11 |   | 2.2E-13 |   | 1E-12 |   | 0 |    | 0 |       |      | 3E-10 | 2E-11 |
| upper limit    | 3.14E-10 |          |    | 2.1E-10 |    | 3E-10 |    | 1E-10 |   | 4.9E-11 |   | 3E-11 |   | 0 |    | 0 |       |      | 4E-10 | 7E-11 |
| SEM*           | 3.35E-11 |          |    | 3.6E-11 |    | 4E-11 |    | 2E-11 |   | 9E-12   |   | 7E-12 |   | 0 |    | 0 |       |      | 3E-11 | 3E-10 |

\* SEM is the standart error.
