# Supplementary material
Source: publisher figshare collection journal article supplement (https://gsajournals.figshare.com/articles/dataset/_/12411035)
Supplement: Supplementary file 6 [file 1]

Suppl. Table 7. *Haloferax volcanii* pHv3 base substitution and inserion-deletion (indel) summary statistics

| MA<br>Line | Substitutions |       |       |       |       |       |               |       |   |   |   | Indels |      |   |   |   |       | Total<br>sites | Gen. | Base-<br>sub<br>Rate | Indel<br>Rate |
|------------|---------------|-------|-------|-------|-------|-------|---------------|-------|---|---|---|--------|------|---|---|---|-------|----------------|------|----------------------|---------------|
|            | Transitions   |       |       |       |       |       | Transversions |       |   |   |   | Ins.   | Del. |   |   |   |       |                |      |                      |               |
|            | GC>AT         | AT>GC | AT>TA | GC>TA | AT>CG | GC>CG |               |       |   |   |   |        |      |   |   |   |       |                |      |                      |               |
| Hv1        | 1             | 1E-09 | 0     | 0     | 0     | 0     | 0             | 0     | 0 | 0 | 0 | 0      | 0    | 0 | 0 | 0 | 3E+05 | 3384           | 0    | 0                    |               |
| Hv2        | 0             | 0     | 0     | 0     | 0     | 0     | 0             | 0     | 0 | 0 | 0 | 0      | 0    | 0 | 0 | 0 | 3E+05 | 3456           | 0    | 0                    |               |
| Hv4        | 0             | 0     | 0     | 0     | 0     | 0     | 0             | 0     | 0 | 0 | 0 | 0      | 0    | 0 | 0 | 0 | 3E+05 | 3456           | 0    | 0                    |               |
| Hv5        | 0             | 0     | 0     | 0     | 0     | 0     | 0             | 0     | 0 | 0 | 0 | 0      | 0    | 0 | 0 | 0 | 3E+05 | 3456           | 0    | 0                    |               |
| Hv7        | 0             | 0     | 0     | 0     | 0     | 0     | 0             | 0     | 0 | 0 | 0 | 0      | 0    | 0 | 0 | 0 | 3E+05 | 3072           | 0    | 0                    |               |
| Hv8        | 0             | 0     | 0     | 0     | 0     | 0     | 0             | 0     | 0 | 0 | 0 | 0      | 0    | 0 | 0 | 0 | 3E+05 | 3384           | 0    | 0                    |               |
| Hv16       | 1             | 1E-09 | 0     | 0     | 0     | 0     | 0             | 0     | 0 | 0 | 0 | 0      | 0    | 0 | 0 | 0 | 3E+05 | 3504           | 0    | 0                    |               |
| Hv17       | 0             | 0     | 0     | 0     | 0     | 0     | 0             | 0     | 0 | 0 | 0 | 0      | 0    | 0 | 0 | 0 | 3E+05 | 3528           | 0    | 0                    |               |
| Hv18       | 0             | 0     | 0     | 0     | 0     | 0     | 0             | 0     | 0 | 0 | 0 | 0      | 0    | 0 | 0 | 0 | 3E+05 | 3312           | 0    | 0                    |               |
| Hv19       | 0             | 0     | 0     | 0     | 0     | 0     | 0             | 0     | 0 | 0 | 0 | 0      | 0    | 0 | 0 | 0 | 3E+05 | 3288           | 0    | 0                    |               |
| Hv20       | 0             | 0     | 0     | 0     | 0     | 0     | 0             | 0     | 0 | 0 | 0 | 0      | 0    | 0 | 0 | 0 | 3E+05 | 3168           | 0    | 0                    |               |
| Hv21       | 0             | 0     | 0     | 0     | 0     | 0     | 0             | 0     | 0 | 0 | 0 | 0      | 0    | 0 | 0 | 0 | 3E+05 | 3096           | 0    | 0                    |               |
| Hv22       | 0             | 0     | 0     | 0     | 0     | 0     | 0             | 0     | 0 | 0 | 0 | 0      | 0    | 0 | 0 | 0 | 3E+05 | 2832           | 0    | 0                    |               |
| Hv23       | 0             | 0     | 0     | 0     | 0     | 0     | 0             | 0     | 0 | 0 | 0 | 0      | 0    | 0 | 0 | 0 | 3E+05 | 3240           | 0    | 0                    |               |
| Hv25       | 0             | 0     | 0     | 0     | 0     | 0     | 0             | 0     | 0 | 0 | 0 | 0      | 0    | 0 | 0 | 0 | 4E+05 | 3360           | 0    | 0                    |               |
| Hv26       | 0             | 0     | 0     | 0     | 0     | 0     | 0             | 0     | 0 | 0 | 0 | 0      | 0    | 0 | 0 | 0 | 3E+05 | 3360           | 0    | 0                    |               |
| Hv29       | 0             | 0     | 0     | 0     | 0     | 0     | 0             | 0     | 0 | 0 | 0 | 0      | 0    | 0 | 0 | 0 | 3E+05 | 3168           | 0    | 0                    |               |
| Hv30       | 0             | 0     | 0     | 0     | 0     | 0     | 0             | 0     | 0 | 0 | 0 | 0      | 0    | 0 | 0 | 0 | 3E+05 | 3360           | 0    | 0                    |               |
| Hv32       | 0             | 0     | 0     | 0     | 0     | 0     | 0             | 0     | 0 | 0 | 0 | 0      | 0    | 0 | 0 | 0 | 3E+05 | 3312           | 0    | 0                    |               |
| Hv33       | 0             | 0     | 0     | 0     | 0     | 0     | 0             | 0     | 0 | 0 | 0 | 0      | 0    | 0 | 0 | 0 | 3E+05 | 3240           | 0    | 0                    |               |
| Hv34       | 0             | 0     | 0     | 0     | 1     | 2E-09 | 1             | 1E-09 | 0 | 0 | 0 | 0      | 0    | 0 | 0 | 0 | 3E+05 | 3336           | 0    | 0                    |               |
| Hv35       | 0             | 0     | 0     | 0     | 0     | 0     | 0             | 0     | 0 | 0 | 0 | 0      | 0    | 0 | 0 | 0 | 3E+05 | 3288           | 0    | 0                    |               |
| Hv41       | 0             | 0     | 0     | 0     | 0     | 0     | 0             | 0     | 0 | 0 | 0 | 0      | 0    | 0 | 0 | 0 | 3E+05 | 3216           | 0    | 0                    |               |
| Hv42       | 0             | 0     | 0     | 0     | 0     | 0     | 0             | 0     | 0 | 0 | 0 | 0      | 0    | 0 | 0 | 0 | 3E+05 | 3192           | 0    | 0                    |               |
| Hv43       | 0             | 0     | 0     | 0     | 0     | 0     | 0             | 0     | 0 | 0 | 0 | 0      | 0    | 0 | 0 | 0 | 3E+05 | 3360           | 0    | 0                    |               |
| Hv44       | 0             | 0     | 0     | 0     | 0     | 0     | 0             | 0     | 0 | 0 | 0 | 0      | 0    | 0 | 0 | 0 | 3E+05 | 2904           | 0    | 0                    |               |
| Hv45       | 1             | 1E-09 | 1     | 3E-09 | 0     | 0     | 1             | 1E-09 | 0 | 0 | 0 | 0      | 0    | 0 | 0 | 0 | 3E+05 | 3120           | 0    | 0                    |               |
| Hv46       | 0             | 0     | 0     | 0     | 0     | 0     | 1             | 1E-09 | 0 | 0 | 0 | 0      | 0    | 0 | 0 | 0 | 3E+05 | 3288           | 0    | 0                    |               |
| Hv47       | 0             | 0     | 0     | 0     | 0     | 0     | 0             | 0     | 0 | 0 | 0 | 0      | 0    | 0 | 0 | 0 | 3E+05 | 3408           | 0    | 0                    |               |
| Hv48       | 0             | 0     | 1     | 2E-09 | 0     | 0     | 0             | 0     | 0 | 0 | 0 | 0      | 0    | 0 | 0 | 0 | 3E+05 | 3312           | 0    | 0                    |               |
| Hv49       | 0             | 0     | 1     | 2E-09 | 0     | 0     | 0             | 0     | 0 | 0 | 0 | 0      | 0    | 0 | 0 | 0 | 3E+05 | 3336           | 0    | 0                    |               |
| Hv50       | 1             | 1E-09 | 0     | 0     | 0     | 0     | 1             | 1E-09 | 0 | 0 | 0 | 0      | 0    | 0 | 0 | 0 | 3E+05 | 3408           | 0    | 0                    |               |
| Hv51       | 0             | 0     | 0     | 0     | 0     | 0     | 0             | 0     | 0 | 0 | 0 | 0      | 0    | 0 | 0 | 0 | 3E+05 | 3288           | 0    | 0                    |               |
| Hv52       | 0             | 0     | 0     | 0     | 0     | 0     | 0             | 0     | 0 | 0 | 0 | 0      | 0    | 0 | 0 | 0 | 4E+05 | 3600           | 0    | 0                    |               |
| Hv53       | 0             | 0     | 0     | 0     | 0     | 0     | 0             | 0     | 0 | 0 | 0 | 0      | 0    | 0 | 0 | 0 | 3E+05 | 3456           | 0    | 0                    |               |
| Hv54       | 1             | 1E-09 | 0     | 0     | 0     | 0     | 0             | 0     | 0 | 0 | 0 | 0      | 0    | 0 | 0 | 0 | 3E+05 | 3528           | 0    | 0                    |               |
| Hv65       | 0             | 0     | 0     | 0     | 0     | 0     | 0             | 0     | 0 | 0 | 0 | 0      | 0    | 0 | 0 | 0 | 3E+05 | 3384           | 0    | 0                    |               |
| Hv66       | 0             | 0     | 0     | 0     | 0     | 0     | 0             | 0     | 0 | 0 | 0 | 0      | 0    | 0 | 0 | 0 | 3E+05 | 3336           | 0    | 0                    |               |
| Hv67       | 0             | 0     | 0     | 0     | 0     | 0     | 0             | 0     | 0 | 0 | 0 | 0      | 0    | 0 | 0 | 0 | 3E+05 | 3168           | 0    | 0                    |               |

|             |       |       |   |       |   |       |   |       |   |   |   |   |   |   |   |   |       |      |   |   |
|-------------|-------|-------|---|-------|---|-------|---|-------|---|---|---|---|---|---|---|---|-------|------|---|---|
| Hv68        | 0     | 0     | 0 | 0     | 0 | 0     | 0 | 0     | 0 | 0 | 0 | 0 | 0 | 0 | 0 | 0 | 3E+05 | 3216 | 0 | 0 |
| Hv69        | 0     | 0     | 0 | 0     | 0 | 0     | 0 | 0     | 0 | 0 | 0 | 0 | 0 | 0 | 0 | 0 | 3E+05 | 3336 | 0 | 0 |
| Hv73        | 1     | 1E-09 | 0 | 0     | 0 | 0     | 0 | 0     | 0 | 0 | 0 | 0 | 0 | 0 | 0 | 0 | 3E+05 | 3096 | 0 | 0 |
| Hv74        | 0     | 0     | 0 | 0     | 0 | 0     | 0 | 0     | 0 | 0 | 0 | 0 | 0 | 0 | 0 | 0 | 3E+05 | 3192 | 0 | 0 |
| Hv75        | 0     | 0     | 0 | 0     | 0 | 0     | 0 | 0     | 0 | 0 | 0 | 0 | 0 | 0 | 0 | 0 | 3E+05 | 3192 | 0 | 0 |
| Hv76        | 0     | 0     | 0 | 0     | 0 | 0     | 1 | 1E-09 | 0 | 0 | 0 | 0 | 0 | 0 | 0 | 0 | 3E+05 | 3168 | 0 | 0 |
| Hv77        | 2     | 3E-09 | 0 | 0     | 0 | 0     | 0 | 0     | 0 | 0 | 0 | 0 | 0 | 0 | 0 | 0 | 3E+05 | 3144 | 0 | 0 |
| Hv79        | 0     | 0     | 0 | 0     | 0 | 0     | 0 | 0     | 0 | 0 | 0 | 0 | 0 | 0 | 0 | 0 | 3E+05 | 3168 | 0 | 0 |
| Hv80        | 0     | 0     | 0 | 0     | 0 | 0     | 0 | 0     | 0 | 0 | 0 | 0 | 0 | 0 | 0 | 0 | 3E+05 | 3000 | 0 | 0 |
| Hv85        | 0     | 0     | 0 | 0     | 0 | 0     | 0 | 0     | 0 | 0 | 0 | 0 | 0 | 0 | 0 | 0 | 4E+05 | 3096 | 0 | 0 |
| Hv86        | 0     | 0     | 0 | 0     | 0 | 0     | 0 | 0     | 0 | 0 | 0 | 0 | 0 | 0 | 0 | 0 | 3E+05 | 3096 | 0 | 0 |
| Hv87        | 1     | 1E-09 | 0 | 0     | 0 | 0     | 0 | 0     | 0 | 0 | 0 | 0 | 0 | 0 | 0 | 0 | 3E+05 | 3312 | 0 | 0 |
| Hv88        | 0     | 0     | 0 | 0     | 0 | 0     | 0 | 0     | 0 | 0 | 0 | 0 | 0 | 0 | 0 | 0 | 3E+05 | 3432 | 0 | 0 |
| Hv90        | 0     | 0     | 0 | 0     | 0 | 0     | 0 | 0     | 0 | 0 | 0 | 0 | 0 | 0 | 0 | 0 | 3E+05 | 3144 | 0 | 0 |
| Hv98        | 0     | 0     | 0 | 0     | 0 | 0     | 0 | 0     | 0 | 0 | 0 | 0 | 0 | 0 | 0 | 0 | 3E+05 | 3312 | 0 | 0 |
|             | 9     |       | 3 |       | 1 |       | 5 |       | 0 |   | 0 |   | 0 |   | 0 |   |       |      |   |   |
| Overall mut | 2E-10 |       |   | 1E-10 |   | 5E-11 |   | 1E-10 |   | 0 |   | 0 |   | 0 |   | 0 |       |      | 0 | 0 |
| lower limit | 1E-10 |       |   | 3E-11 |   | 1E-12 |   | 4E-11 |   | 0 |   | 0 |   | 0 |   | 0 |       |      | 0 | 0 |
| upper limit | 4E-10 |       |   | 4E-10 |   | 3E-10 |   | 3E-10 |   | 0 |   | 0 |   | 0 |   | 0 |       |      | 0 | 0 |
| SEM*        | 8E-11 |       |   | 8E-11 |   | 4E-11 |   | 6E-11 |   | 0 |   | 0 |   | 0 |   | 0 |       |      | 0 | 0 |

\* SEM is the standart error.
