# Supplementary material
Source: publisher figshare collection journal article supplement (https://gsajournals.figshare.com/articles/dataset/_/12411035)
Supplement: Supplementary file 7 [file 1]

Suppl. Table 8. *Haloferax volcanii* pHv4 base substitution and inserion-deletion (indel) summary statistics

| MA<br>Line | Substitutions |       |       |               |       |       |   |       |      |      |   | Indels |   |   |   | Total<br>sites | Gen.  | Sites×<br>Gen | Base-<br>sub<br>Rate | Indel<br>Rate |       |
|------------|---------------|-------|-------|---------------|-------|-------|---|-------|------|------|---|--------|---|---|---|----------------|-------|---------------|----------------------|---------------|-------|
|            | Transitions   |       |       | Transversions |       |       |   |       | Ins. | Del. |   |        |   |   |   |                |       |               |                      |               |       |
|            | GC>AT         | AT>GC | AT>TA | GC>TA         | AT>CG | GC>CG |   |       |      |      |   |        |   |   |   |                |       |               |                      |               |       |
| Hv1        | 0             | 0     | 0     | 0             | 0     | 0     | 0 | 0     | 0    | 0    | 0 | 0      | 0 | 0 | 0 | 0              | 4E+05 | 3384          | 1E+09                | 0             | 0     |
| Hv2        | 1             | 1E-09 | 0     | 0             | 0     | 0     | 0 | 0     | 0    | 0    | 0 | 0      | 0 | 0 | 0 | 0              | 4E+05 | 3456          | 1E+09                | 8E-10         | 0     |
| Hv4        | 0             | 0     | 0     | 0             | 0     | 0     | 0 | 0     | 0    | 0    | 0 | 0      | 0 | 0 | 0 | 0              | 4E+05 | 3456          | 1E+09                | 0             | 0     |
| Hv5        | 0             | 0     | 0     | 0             | 0     | 0     | 0 | 0     | 0    | 0    | 0 | 0      | 0 | 0 | 0 | 0              | 3E+05 | 3456          | 1E+09                | 0             | 0     |
| Hv7        | 0             | 0     | 0     | 0             | 0     | 0     | 0 | 0     | 0    | 0    | 0 | 0      | 0 | 0 | 0 | 0              | 4E+05 | 3072          | 1E+09                | 0             | 0     |
| Hv8        | 0             | 0     | 0     | 0             | 0     | 0     | 0 | 0     | 0    | 0    | 0 | 0      | 0 | 0 | 0 | 0              | 3E+05 | 3384          | 1E+09                | 0             | 0     |
| Hv16       | 0             | 0     | 0     | 0             | 0     | 0     | 0 | 0     | 0    | 0    | 0 | 0      | 0 | 0 | 0 | 0              | 3E+05 | 3504          | 1E+09                | 0             | 0     |
| Hv17       | 0             | 0     | 0     | 0             | 0     | 0     | 0 | 0     | 0    | 0    | 0 | 0      | 0 | 0 | 1 | 8E-10          | 4E+05 | 3528          | 1E+09                | 0             | 8E-10 |
| Hv18       | 1             | 1E-09 | 0     | 0             | 0     | 0     | 0 | 0     | 0    | 0    | 0 | 0      | 0 | 0 | 0 | 0              | 4E+05 | 3312          | 1E+09                | 9E-10         | 0     |
| Hv19       | 0             | 0     | 0     | 0             | 0     | 0     | 0 | 0     | 0    | 0    | 0 | 0      | 0 | 0 | 1 | 9E-10          | 3E+05 | 3288          | 1E+09                | 0             | 9E-10 |
| Hv20       | 0             | 0     | 0     | 0             | 0     | 0     | 0 | 0     | 0    | 0    | 0 | 0      | 0 | 0 | 1 | 9E-10          | 3E+05 | 3168          | 1E+09                | 0             | 9E-10 |
| Hv21       | 0             | 0     | 0     | 0             | 0     | 0     | 0 | 0     | 0    | 0    | 0 | 0      | 0 | 0 | 0 | 0              | 4E+05 | 3096          | 1E+09                | 0             | 0     |
| Hv22       | 0             | 0     | 0     | 0             | 1     | 3E-09 | 0 | 0     | 0    | 0    | 0 | 0      | 0 | 0 | 0 | 0              | 4E+05 | 2832          | 1E+09                | 1E-09         | 0     |
| Hv23       | 0             | 0     | 0     | 0             | 0     | 0     | 0 | 0     | 0    | 0    | 0 | 0      | 0 | 0 | 0 | 0              | 4E+05 | 3240          | 1E+09                | 0             | 0     |
| Hv25       | 0             | 0     | 0     | 0             | 0     | 0     | 1 | 8E-10 | 0    | 0    | 0 | 0      | 0 | 0 | 0 | 0              | 5E+05 | 3360          | 2E+09                | 6E-10         | 0     |
| Hv26       | 0             | 0     | 0     | 0             | 0     | 0     | 0 | 0     | 0    | 0    | 1 | 1E-09  | 0 | 0 | 0 | 0              | 3E+05 | 3360          | 1E+09                | 9E-10         | 0     |
| Hv29       | 2             | 3E-09 | 0     | 0             | 0     | 0     | 0 | 0     | 0    | 0    | 0 | 0      | 0 | 0 | 0 | 0              | 4E+05 | 3168          | 1E+09                | 2E-09         | 0     |
| Hv30       | 0             | 0     | 0     | 0             | 0     | 0     | 1 | 1E-09 | 0    | 0    | 0 | 0      | 0 | 0 | 0 | 0              | 4E+05 | 3360          | 1E+09                | 8E-10         | 0     |
| Hv32       | 0             | 0     | 0     | 0             | 0     | 0     | 0 | 0     | 0    | 0    | 0 | 0      | 0 | 0 | 0 | 0              | 4E+05 | 3312          | 1E+09                | 0             | 0     |
| Hv33       | 1             | 1E-09 | 1     | 2E-09         | 0     | 0     | 1 | 1E-09 | 0    | 0    | 0 | 0      | 0 | 0 | 1 | 9E-10          | 4E+05 | 3240          | 1E+09                | 3E-09         | 9E-10 |
| Hv34       | 1             | 1E-09 | 0     | 0             | 0     | 0     | 0 | 0     | 0    | 0    | 0 | 0      | 0 | 0 | 0 | 0              | 3E+05 | 3336          | 1E+09                | 9E-10         | 0     |
| Hv35       | 0             | 0     | 0     | 0             | 0     | 0     | 1 | 1E-09 | 0    | 0    | 0 | 0      | 0 | 0 | 0 | 0              | 4E+05 | 3288          | 1E+09                | 9E-10         | 0     |
| Hv41       | 0             | 0     | 0     | 0             | 0     | 0     | 0 | 0     | 0    | 0    | 1 | 1E-09  | 0 | 0 | 0 | 0              | 4E+05 | 3216          | 1E+09                | 9E-10         | 0     |
| Hv42       | 0             | 0     | 0     | 0             | 0     | 0     | 0 | 0     | 0    | 0    | 0 | 0      | 0 | 0 | 0 | 0              | 4E+05 | 3192          | 1E+09                | 0             | 0     |
| Hv43       | 0             | 0     | 0     | 0             | 0     | 0     | 0 | 0     | 0    | 0    | 0 | 0      | 0 | 0 | 0 | 0              | 3E+05 | 3360          | 1E+09                | 0             | 0     |
| Hv44       | 0             | 0     | 1     | 3E-09         | 0     | 0     | 0 | 0     | 0    | 0    | 0 | 0      | 0 | 0 | 0 | 0              | 4E+05 | 2904          | 1E+09                | 1E-09         | 0     |
| Hv45       | 0             | 0     | 0     | 0             | 0     | 0     | 0 | 0     | 0    | 0    | 0 | 0      | 0 | 0 | 0 | 0              | 3E+05 | 3120          | 1E+09                | 0             | 0     |
| Hv46       | 0             | 0     | 0     | 0             | 0     | 0     | 0 | 0     | 0    | 0    | 0 | 0      | 0 | 0 | 0 | 0              | 3E+05 | 3288          | 1E+09                | 0             | 0     |
| Hv47       | 0             | 0     | 1     | 2E-09         | 1     | 2E-09 | 0 | 0     | 0    | 0    | 0 | 0      | 0 | 0 | 0 | 0              | 4E+05 | 3408          | 1E+09                | 2E-09         | 0     |
| Hv48       | 0             | 0     | 0     | 0             | 0     | 0     | 0 | 0     | 0    | 0    | 0 | 0      | 0 | 0 | 1 | 9E-10          | 3E+05 | 3312          | 1E+09                | 0             | 9E-10 |
| Hv49       | 0             | 0     | 0     | 0             | 0     | 0     | 0 | 0     | 0    | 0    | 0 | 0      | 0 | 0 | 0 | 0              | 4E+05 | 3336          | 1E+09                | 0             | 0     |
| Hv50       | 0             | 0     | 0     | 0             | 0     | 0     | 1 | 1E-09 | 0    | 0    | 0 | 0      | 0 | 0 | 0 | 0              | 4E+05 | 3408          | 1E+09                | 8E-10         | 0     |
| Hv51       | 1             | 2E-09 | 0     | 0             | 0     | 0     | 1 | 2E-09 | 0    | 0    | 0 | 0      | 0 | 0 | 0 | 0              | 3E+05 | 3288          | 9E+08                | 2E-09         | 0     |
| Hv52       | 0             | 0     | 0     | 0             | 0     | 0     | 0 | 0     | 0    | 0    | 0 | 0      | 0 | 0 | 0 | 0              | 6E+05 | 3600          | 2E+09                | 0             | 0     |
| Hv53       | 0             | 0     | 1     | 2E-09         | 0     | 0     | 0 | 0     | 0    | 0    | 0 | 0      | 0 | 0 | 0 | 0              | 3E+05 | 3456          | 1E+09                | 8E-10         | 0     |
| Hv54       | 0             | 0     | 0     | 0             | 0     | 0     | 0 | 0     | 0    | 0    | 0 | 0      | 0 | 0 | 0 | 0              | 3E+05 | 3528          | 1E+09                | 0             | 0     |
| Hv65       | 2             | 3E-09 | 0     | 0             | 0     | 0     | 0 | 0     | 0    | 0    | 0 | 0      | 0 | 0 | 0 | 0              | 3E+05 | 3384          | 1E+09                | 2E-09         | 0     |
| Hv66       | 0             | 0     | 0     | 0             | 0     | 0     | 0 | 0     | 0    | 0    | 0 | 0      | 0 | 0 | 0 | 0              | 3E+05 | 3336          | 1E+09                | 0             | 0     |
| Hv67       | 0             | 0     | 0     | 0             | 0     | 0     | 0 | 0     | 0    | 0    | 0 | 0      | 0 | 0 | 0 | 0              | 4E+05 | 3168          | 1E+09                | 0             | 0     |
| Hv68       | 0             | 0     | 0     | 0             | 0     | 0     | 0 | 0     | 0    | 0    | 0 | 0      | 0 | 0 | 0 | 0              | 4E+05 | 3216          | 1E+09                | 0             | 0     |

|                  |       |       |       |       |       |       |       |   |       |       |       |   |       |   |       |   |       |      |       |       |   |
|------------------|-------|-------|-------|-------|-------|-------|-------|---|-------|-------|-------|---|-------|---|-------|---|-------|------|-------|-------|---|
| Hv69             | 0     | 0     | 0     | 0     | 0     | 0     | 0     | 0 | 0     | 0     | 0     | 0 | 0     | 0 | 0     | 0 | 4E+05 | 3336 | 1E+09 | 0     | 0 |
| Hv73             | 0     | 0     | 0     | 0     | 0     | 0     | 0     | 0 | 0     | 0     | 0     | 0 | 0     | 0 | 0     | 0 | 3E+05 | 3096 | 1E+09 | 0     | 0 |
| Hv74             | 0     | 0     | 1     | 2E-09 | 0     | 0     | 0     | 0 | 0     | 0     | 0     | 0 | 0     | 0 | 0     | 0 | 4E+05 | 3192 | 1E+09 | 9E-10 | 0 |
| Hv75             | 0     | 0     | 0     | 0     | 0     | 0     | 0     | 0 | 0     | 0     | 0     | 0 | 0     | 0 | 0     | 0 | 3E+05 | 3192 | 1E+09 | 0     | 0 |
| Hv76             | 1     | 1E-09 | 0     | 0     | 0     | 0     | 0     | 0 | 0     | 0     | 0     | 0 | 0     | 0 | 0     | 0 | 4E+05 | 3168 | 1E+09 | 9E-10 | 0 |
| Hv77             | 1     | 1E-09 | 0     | 0     | 1     | 2E-09 | 0     | 0 | 0     | 0     | 0     | 0 | 0     | 0 | 0     | 0 | 4E+05 | 3144 | 1E+09 | 2E-09 | 0 |
| Hv79             | 0     | 0     | 0     | 0     | 0     | 0     | 0     | 0 | 0     | 0     | 0     | 0 | 0     | 0 | 0     | 0 | 4E+05 | 3168 | 1E+09 | 0     | 0 |
| Hv80             | 0     | 0     | 0     | 0     | 0     | 0     | 0     | 0 | 2     | 5E-09 | 0     | 0 | 0     | 0 | 0     | 0 | 4E+05 | 3000 | 1E+09 | 2E-09 | 0 |
| Hv85             | 1     | 1E-09 | 0     | 0     | 0     | 0     | 0     | 0 | 0     | 0     | 0     | 0 | 0     | 0 | 0     | 0 | 5E+05 | 3096 | 1E+09 | 7E-10 | 0 |
| Hv86             | 0     | 0     | 0     | 0     | 0     | 0     | 0     | 0 | 0     | 0     | 0     | 0 | 0     | 0 | 0     | 0 | 3E+05 | 3096 | 9E+08 | 0     | 0 |
| Hv87             | 0     | 0     | 0     | 0     | 0     | 0     | 0     | 0 | 1     | 3E-09 | 0     | 0 | 0     | 0 | 0     | 0 | 3E+05 | 3312 | 1E+09 | 9E-10 | 0 |
| Hv88             | 1     | 1E-09 | 1     | 2E-09 | 0     | 0     | 0     | 0 | 0     | 0     | 0     | 0 | 0     | 0 | 0     | 0 | 3E+05 | 3432 | 1E+09 | 2E-09 | 0 |
| Hv90             | 0     | 0     | 0     | 0     | 0     | 0     | 0     | 0 | 0     | 0     | 0     | 0 | 0     | 0 | 0     | 0 | 4E+05 | 3144 | 1E+09 | 0     | 0 |
| Hv98             | 0     | 0     | 0     | 0     | 0     | 0     | 0     | 0 | 0     | 0     | 0     | 0 | 0     | 0 | 0     | 0 | 3E+05 | 3312 | 1E+09 | 0     | 0 |
|                  | 13    |       | 6     |       | 3     |       | 6     |   | 3     |       | 2     |   | 0     |   | 5     |   |       |      |       |       |   |
| Overall mut rate | 3E-10 |       | 3E-10 |       | 1E-10 |       | 2E-10 |   | 1E-10 |       | 5E-11 |   | 0     |   | 8E-11 |   |       |      | 5E-10 | 8E-11 |   |
| lower limit      | 2E-10 |       | 1E-10 |       | 3E-11 |       | 6E-11 |   | 3E-11 |       | 6E-12 |   | 0     |   | 3E-11 |   |       |      | 4E-10 | 3E-11 |   |
| upper limit      | 6E-10 |       | 6E-10 |       | 4E-10 |       | 3E-10 |   | 4E-10 |       | 2E-10 |   | 6E-11 |   | 2E-10 |   |       |      | 7E-10 | 2E-10 |   |
| SEM*             | 1E-10 |       | 1E-10 |       | 8E-11 |       | 6E-11 |   | 1E-10 |       | 4E-11 |   | 0     |   | 4E-11 |   |       |      | 1E-10 | 4E-11 |   |

\* SEM is the standart error.
