# Supplementary material
Source: publisher figshare collection journal article supplement (https://gsajournals.figshare.com/articles/dataset/_/12411035)
Supplement: Supplementary file 8 [file 1]

**Suppl. Table 1. Differences identified between ancestor and *H. volcanii* reference genome**

| Position          | Mutation | Genic region | Amino acid change | Protein                                   | nonsyn/syn |
|-------------------|----------|--------------|-------------------|-------------------------------------------|------------|
| NC_013964:167873  | A>C      | Coding       | Valin>Glycine     | ABC-transporter substrate binding protein | nonsyn     |
| NC_013964:359036  | G>C      | Coding       | Glycin>Arginin    | cytochrome oxidase-I                      | nonsyn     |
| NC_013967:2410564 | A>G      | Coding       | Leucine>Proline   | 50S ribosomal protein L32e                | nonsyn     |
