# Supplementary material
Source: publisher figshare collection journal article supplement (https://gsajournals.figshare.com/articles/dataset/_/12411035)
Supplement: Supplementary file 9 [file 1]

Suppl. Table 3. Multinucleotide Mutations

| MA Lines | Chromosome  | Position | Reference | Mutant | AD*     | DP** | SAC***         | Homozygous or Heterozygous | Genic Region**** | Amino Acid Change | Gene*****   | Protein         | syn/nonsyn***** |
|----------|-------------|----------|-----------|--------|---------|------|----------------|----------------------------|------------------|-------------------|-------------|-----------------|-----------------|
| Hv29     | NC_013966.1 | 443876   | G         | A      | 0,51    | 51   | 0,0,20,31      | Homozygous                 | Coding           | Thr171Thr         | HVO_RS03775 | hypothetical    | syn             |
| Hv29     | NC_013966.1 | 443893   | G         | A      | 0,39    | 39   | 0,0,13,26      | Homozygous                 | Coding           | Val165Ile         | HVO_RS03775 | hypothetical    | nonsyn          |
| Hv86     | NC_013966.1 | 121338   | G         | A      | 444,269 | 713  | 179,265,87,182 | Heterozygous               | Coding           | Phe41Phe          | HVO_RS19795 | β beta-propelle | syn             |
| Hv86     | NC_013966.1 | 121358   | C         | A      | 424,209 | 633  | 181,243,70,139 | Heterozygous               | Coding           | Ala35Ser          | HVO_RS19795 | β beta-propelle | nonsyn          |
| Hv86     | NC_013966.1 | 121405   | C         | A      | 353,77  | 430  | 140,213,16,61  | Heterozygous               | Coding           | Arg19Leu          | HVO_RS19795 | β beta-propelle | nonsyn          |
| Hv86     | NC_013966.1 | 121413   | G         | C      | 358,58  | 416  | 140,218,3,55   | Heterozygous               | Coding           | Gly16Gly          | HVO_RS19795 | β beta-propelle | syn             |
| Hv90     | NC_013967.1 | 1048889  | A         | G      | 152,48  | 200  | 81,71,20,28    | Heterozygous               | NonCoding        |                   |             |                 |                 |
| Hv90     | NC_013967.1 | 1048893  | G         | A      | 150,49  | 199  | 81,69,20,29    | Heterozygous               | NonCoding        |                   |             |                 |                 |
| Hv90     | NC_013967.1 | 1048899  | A         | C      | 150,57  | 207  | 83,67,23,34    | Heterozygous               | NonCoding        |                   |             |                 |                 |
| Hv90     | NC_013967.1 | 1048911  | G         | A      | 178,63  | 241  | 110,68,26,37   | Heterozygous               | NonCoding        |                   |             |                 |                 |
| Hv90     | NC_013967.1 | 1048916  | A         | C      | 172,63  | 235  | 107,65,25,38   | Heterozygous               | NonCoding        |                   |             |                 |                 |
| Hv90     | NC_013967.1 | 1048918  | G         | T      | 166,63  | 229  | 105,61,25,38   | Heterozygous               | NonCoding        |                   |             |                 |                 |
| Hv90     | NC_013967.1 | 1048920  | C         | T      | 163,63  | 226  | 105,58,25,38   | Heterozygous               | NonCoding        |                   |             |                 |                 |
| Hv90     | NC_013967.1 | 1048933  | A         | G      | 162,72  | 234  | 103,59,30,42   | Heterozygous               | NonCoding        |                   |             |                 |                 |

\*AD is the allelic depths for the reference and alternative alleles

\*\*DP is the approximate read depth

\*\*\*SAC is the number of reads on the forward and reverse strand supporting each allele (including reference)

\*\*\*\*Noncoding - noncoding sequence, Coding - coding sequence.

\*\*\*\*\* Gene is the gene name or type of gene where the base substitution occurs.

\*\*\*\*\* syn - synonymous, nonsyn - nonsynonymous.
