# Supplementary material
Source: publisher figshare collection journal article supplement (https://gsajournals.figshare.com/articles/dataset/_/12411035)
Supplement: Supplementary file 10 [file 1]

**Suppl. Table 4. Indel details**

| MA Lines | Chromosome  | Position | Reference | Indels    | SSR* motif |
|----------|-------------|----------|-----------|-----------|------------|
| Hv1      | NC_013967.1 | 315827   | TACG      | T         | -          |
| Hv7      | NC_013967.1 | 709482   | CT        | C         | -          |
| Hv17     | NC_013966.1 | 468209   | CGATGATGG | C         | -          |
| Hv18     | NC_013967.1 | 683949   | GGC       | G         | 3g         |
| Hv18     | NC_013967.1 | 2302447  | CA        | C         | 3a         |
| Hv19     | NC_013966.1 | 451640   | AGCCCGGCA | A         | -          |
| Hv20     | NC_013966.1 | 112265   | AC        | A         | -          |
| Hv25     | NC_013967.1 | 1924512  | CGGCGGT   | C         | -          |
| Hv33     | NC_013967.1 | 1169790  | ACGAACCGC | A         | -          |
| Hv33     | NC_013966.1 | 187714   | AC        | A         | -          |
| Hv34     | NC_013967.1 | 2772433  | TTCCCC    | T         | -          |
| Hv35     | NC_013967.1 | 2218278  | TCA       | T         | -          |
| Hv42     | NC_013968.1 | 43853    | CA        | C         | -          |
| Hv44     | NC_013967.1 | 1067846  | G         | GCCA      | 4gcc       |
| Hv45     | NC_013967.1 | 1289230  | CCCGGCA   | C         | 4c         |
| Hv48     | NC_013966.1 | 163783   | GT        | G         | -          |
| Hv87     | NC_013967.1 | 1453364  | C         | CGTGGAGGC | -          |
| Hv87     | NC_013967.1 | 1617094  | CA        | C         | -          |
| Hv90     | NC_013967.1 | 2121583  | CT        | C         | -          |

\* SSR is the simple sequence repeat size and motif where the insertion/deletion is found (minimum 3 repeats).
