# Supplementary material
Source: publisher figshare collection journal article supplement (https://gsajournals.figshare.com/articles/dataset/_/12411035)
Supplement: Supplementary file 11 [file 1]

Suppl. Table 10. Structural Variants

| MA Lines | Chromosome  | Left Breakpoint | Right Breakpoint | SV* Type | Length | IS Element                                                     |
|----------|-------------|-----------------|------------------|----------|--------|----------------------------------------------------------------|
| Hv5      | NC_013967.1 | 2264779         | 2267257          | Deletion | 2478   | -                                                              |
| Hv8      | NC_013966.1 | 367080          | 466540           | Deletion | 99460  | IS-H11/IS-H12                                                  |
| Hv16     | NC_013966.1 | 82230           | 110761           | Deletion | 28531  | IS-H51                                                         |
| Hv19     | NC_013966.1 | 18280           | 126100           | Deletion | 107820 | IS-H18                                                         |
| Hv20     | NC_013966.1 | 262600          | 286130           | Deletion | 23530  | IS-H9                                                          |
| Hv20     | NC_013967.1 | 784623          | 785623           | Deletion | 1000   | -                                                              |
| Hv44     | NC_013966.1 | 262600          | 286130           | Deletion | 23530  | IS-H9                                                          |
| Hv45     | NC_013966.1 | 18280           | 126100           | Deletion | 107820 | IS-H18                                                         |
| Hv47     | NC_013966.1 | 376640          | 452640           | Deletion | 76000  | IS-H20                                                         |
| Hv49     | NC_013966.1 | 262600          | 286130           | Deletion | 23530  | IS-H9                                                          |
|          |             |                 |                  |          |        | Unannotated IS-4 like element/ Unannotated IS-110 like element |
| Hv49     | NC_013967.1 | 246700          | 247996           | Deletion | 1296   |                                                                |
| Hv53     | NC_013966.1 | 18280           | 126100           | Deletion | 107820 | IS-H18                                                         |
| Hv54     | NC_013966.1 | 18280           | 126100           | Deletion | 107820 | IS-H18                                                         |
| Hv69     | NC_013966.1 | 367080          | 439300           | Deletion | 72220  | IS-H11                                                         |
| Hv73     | NC_013966.1 | 18280           | 126100           | Deletion | 107820 | IS-H18                                                         |
| Hv77     | NC_013966.1 | 18280           | 126100           | Deletion | 107820 | IS-H18                                                         |
| Hv79     | NC_013966.1 | 367080          | 466540           | Deletion | 99460  | IS-H11/IS-H12                                                  |
| Hv80     | NC_013966.1 | 18280           | 126100           | Deletion | 107820 | IS-H18                                                         |
| Hv87     | NC_013966.1 | 18280           | 126100           | Deletion | 107820 | IS-H18                                                         |
| Hv88     | NC_013966.1 | 18280           | 126100           | Deletion | 107820 | IS-H18                                                         |

\* SV is the structural variant
